# Supplementary material for: Preprotein mature domains contain translocase targeting signals that are essential for secretion
Source: PubMed Central journal article supplement — J Cell Biol. 2017 May 1;216(5):1357–69. doi: 10.1083/jcb.201609022 (PMC5412566; doi:10.1083/jcb.201609022), 2017-05-01
Supplement: JCB_201609022_sm.pdf [file JCB_201609022_sm.pdf]

Chatzi et al., <https://doi.org/10.1083/jcb.201609022>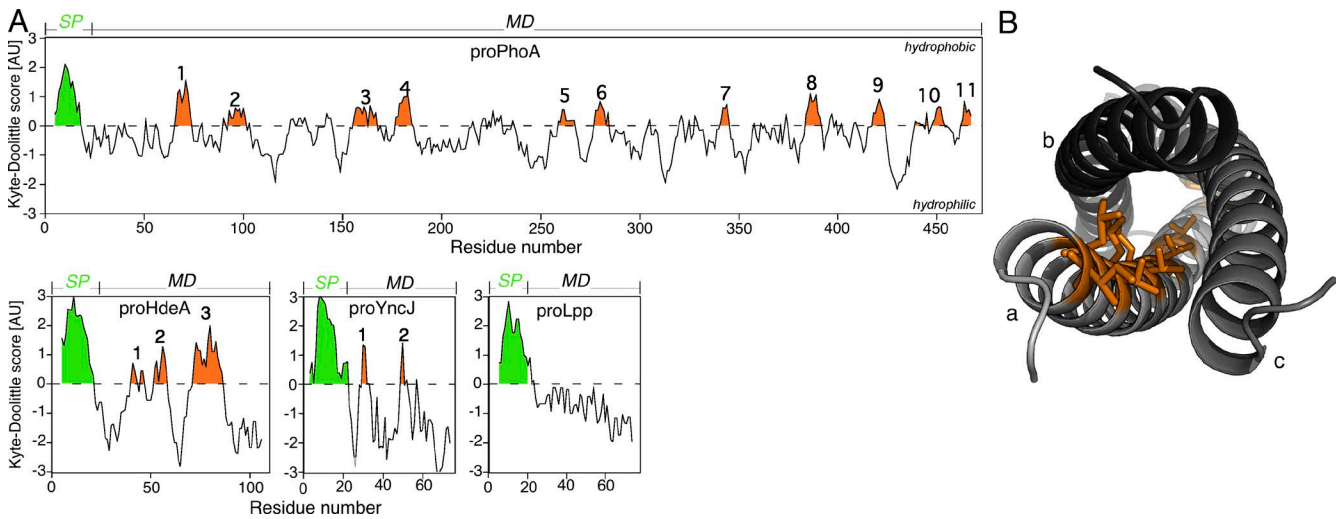

Figure S1. **HPs in preprotein mature domains can be linear or 3D (related to Fig. 1).** (A) Hydrophobicity plots for proPhoA, proHdeA, and proLpp by using ProtScale (<http://web.expasy.org/protscale/>) and a 9-aa window. For visualization purposes, proYncJ is shown using a 5-aa window. Residues corresponding to the signal peptide (SP) or mature domain (MD) of each protein are indicated. The HPs in the mature domain region of each protein are indicated (orange) and numbered (similarly to Fig. 1, B and D). The first HP in YncJ has the lowest hydrophobicity value within our experimental set, yet it is important for targeting (Fig. 1 D). This value was used to set the hydrophobicity threshold of what was defined as a “hydrophobic patch used for targeting” (see Materials and methods section Bioinformatics approach to define hydrophobic patches on proteins) and therefore determines a functional MTS. proLpp mature domain has no detectable linear HPs. The determined HPs were experimentally verified as functional MTSs by hydrophobicity-reducing mutations; PhoAM1, I67A/I68T/L69A/L70T/I71A; PhoAM2, F93A/F94A/I97A/L100A/L102A; PhoAM8-11, L385A/V386T/I387A/V388T/V419T/M420T/V421T/M422A/Y424T/L439A/I441T/Y444T/V451A/V452T/L454T/F461A/Y462T/A466T/A467T/L4668T/L470T; HdeA(noMTS), F42A/L43T/V45A/F49T/V54T/F56T/L60A/V70T/LV1T/V73A/I76T/V79A/I83T/V84A; YncJ(noMTS), F29T/V30A/W31T/V32T/V35A/L48A/V51T). (B) View of the native Lpp trimer (PDB: 1EQ7) along its longitudinal axis. The hydrophobic amino acids of each helix (highlighted in orange; as in Fig. 1 E) face inwards in the trimer core and thus are shielded from solvent. The 3D MTS of Lpp was verified as functional by hydrophobicity-reducing mutations (I27A/L30A/V34A/L37A/V41A/L44A/V48A/V55A/L69A, hereafter Lpp(noMTS)).

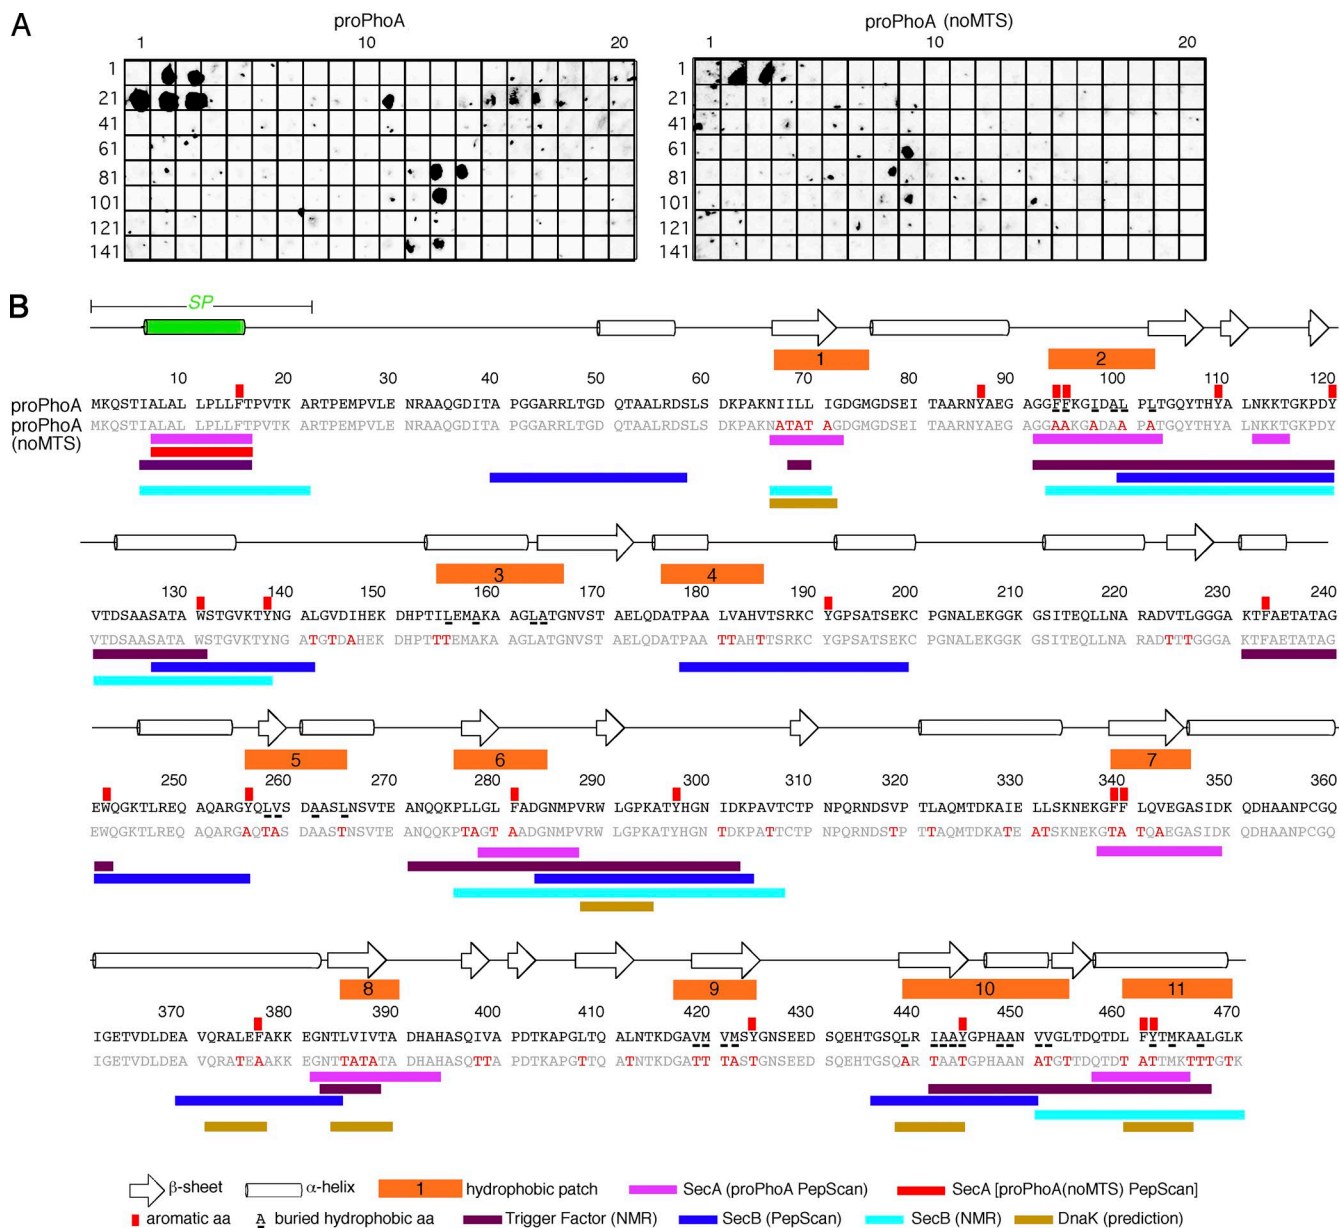

Figure S2. **proPhoA MTSs are required for mature domain targeting (related to Figs. 1 and 3).** (A) SecA binding to proPhoA (left) or proPhoA(noMTS) (right) using 13-residue peptide arrays with 10-residue overlap (for the identity of peptides, see Table S9, in combination with B). proPhoA(noMTS) was designed and used only in PepScans. A representative experiment, after immunostaining with  $\alpha$ -SecA antibody (1:50,000 dilution), is shown;  $n = 6$ . When using the peptide array of proPhoA(noMTS), only binding of SecA on the signal peptide is retained. (B) SecA and chaperone binding sites on proPhoA. The proPhoA primary sequence and secondary structure are shown; residues that were mutated (as indicated) in proPhoA(noMTS) are colored red. Below them, the binding sites for the following chaperones are colored as indicated: trigger factor, as determined by nuclear magnetic resonance (Saio et al., 2014); SecB, as determined by PepScan analysis (Knoblauch et al., 1999) and nuclear magnetic resonance (Huang et al., 2016); DnaK, as predicted by the Limbo server (<http://limbo.switchlab.org/>); and SecA, as determined by PepScan analysis in the present study (A). Aromatic residues that were proposed to be important for chaperone interactions (Patzelt et al., 2001) are indicated. Hydrophobic amino acids that are buried based on the crystal structure of PhoA (PDB: 3BDG) are underlined. Soluble SecA binds on the signal peptide (SP) and to six more mature domain HPs. Some mature domain HPs might also be recognized by chaperones.

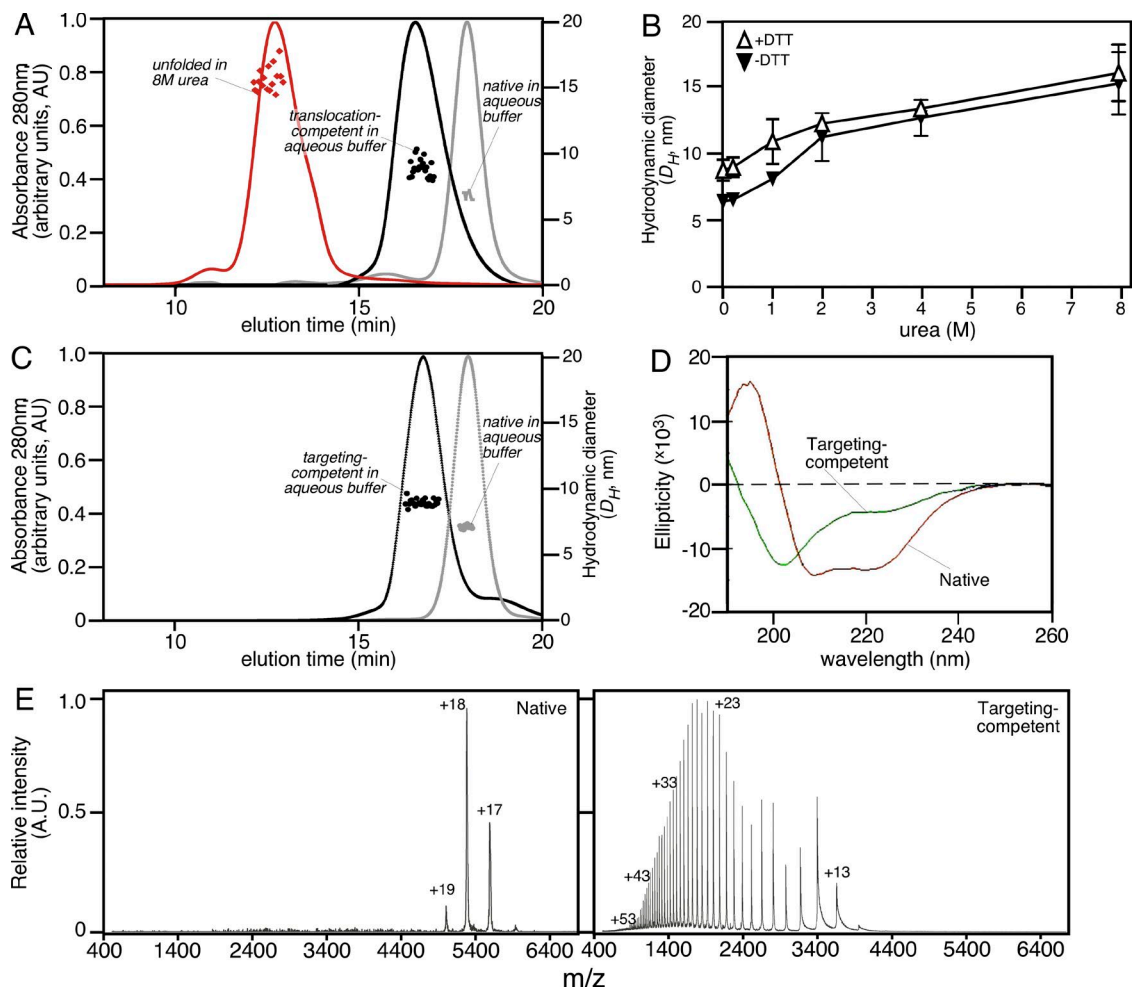

**Figure S3. Biophysical characterization of the proPhoA and PhoA targeting-competent state (related to Figs. 1 and 3).** (A) Representative gel permeation chromatography coupled to multiangle and quasielastic light scattering experiments for proPhoA under native (gray, no urea; no DTT), translocation-competent (black, no urea; 1 mM DTT) and strong denaturing (red, 8 M urea; 1 mM DTT) conditions; UV traces (left y axis,  $A_{280}$  arbitrary units) are shown as a function of time (x axis, minutes);  $n > 3$ . For the native species, natively purified proPhoA was diluted and chromatographed in buffer L. For the translocation-competent and the completely unfolded species, proPhoA purified in 6 M urea was preincubated with 10 mM DTT (30 min; ice), was chromatographed (and buffer exchanged during the chromatography) in buffer L supplemented with the indicated urea and DTT concentration. Protein concentrations after chromatography were in the range of 50–100  $\mu$ M, anticipated by a 10-fold protein dilution on the column (0.5 mM protein loaded). The hydrodynamic diameters (right y axis,  $D_h$ , nanometers) of natively folded monomeric proPhoA (gray squares), translocation-competent proPhoA (black circles), and fully denatured proPhoA (red diamonds) measured online by quasielastic light scattering are shown; mass measurements are not depicted. By default, the translocation-competent proPhoA is also targeting competent. (B) Summary of quasielastic light scattering measurements of the proPhoA hydrodynamic diameter (y axis;  $D_h$ , nanometers), derived from experiments similar to those shown in A, under oxidizing (–DTT) or reducing conditions (+DTT) as a function of urea concentration (x axis). For measurements in 0–0.2 M urea,  $\pm$ DTT,  $n = 10$ –15; for all other urea concentration points  $\pm$ DTT,  $n = 3$ –6; SDs are given as error bars. The targeting/translocation-competent proPhoA is the reduced form at 0–0.2 M urea. (C) Representative gel permeation chromatography coupled to multiangle and quasielastic light scattering experiments of PhoA under native (gray, no urea; no DTT) and targeting-competent (black, no urea; 1 mM DTT) conditions;  $n = 3$ . UV traces (left y axis,  $A_{280}$  arbitrary units) are shown as a function of time (x axis, minutes). For the native species, natively purified PhoA was diluted and chromatographed in buffer L. For the targeting-competent species, urea purified PhoA was preincubated with 10 mM DTT (30 min; ice) before being diluted and chromatographed in buffer L supplemented with 1 mM DTT. The hydrodynamic diameters (right y axis,  $D_h$ , nanometers) of natively folded dimeric PhoA (gray circles) and targeting-competent PhoA (black circles), measured online by quasielastic light scattering, are shown; mass measurements are not depicted. The targeting-competent PhoA is also translocation-competent on two conditions: (a) by trans addition of its signal peptide or (b) by using a *prl* translocase (Gouridis et al., 2009). (D) Comparison of two representative circular dichroism spectra recorded for natively folded (dark red; no DTT) and targeting-competent (green; 1 mM DTT) PhoA. x axis: wavelength (nanometers); y axis: ellipticity. For the targeting-competent species, urea purified PhoA, preincubated with 10 mM DTT (30 min; ice) was dialyzed (5 liters; 15 h; 4°C) in buffer U supplemented with 8 M urea and 1 mM DTT. For the natively folded species, natively purified PhoA was dialyzed in 5 liters buffer U (15 h; 4°C). Both PhoA species were diluted in buffer U supplemented with 1 mM EDTA; 0.2 M urea; DTT (as indicated) and spectra were recorded. As seen with the corresponding proPhoA species (Fig. 3 B), natively folded PhoA exhibits two minima (208 and 222 nm), typical of folded, predominantly  $\alpha$ -helical proteins, whereas the targeting-competent PhoA does not. However, if the urea-purified PhoA is dialyzed (5 liters; 15 h) in buffer U in the absence of DTT, it folds and gives spectra similar to the one shown for the natively purified PhoA; similar behavior was observed for proPhoA under the same conditions (not depicted). (E) Representative native nano-electrospray ionization mass spectrometry spectra of native and targeting-competent PhoA;  $n = 3$ . Targeting-competent PhoA acquires many charges with broad distribution, typical of unfolded proteins with increased solvent accessible surface area (Testa et al., 2013) and has a mass of 48.4 kD, consistent with that of a monomer, whereas native PhoA acquires few charges with narrow distribution, typical of well-folded, compact proteins, and has a mass of 96.6 kD, consistent with that of a dimer.

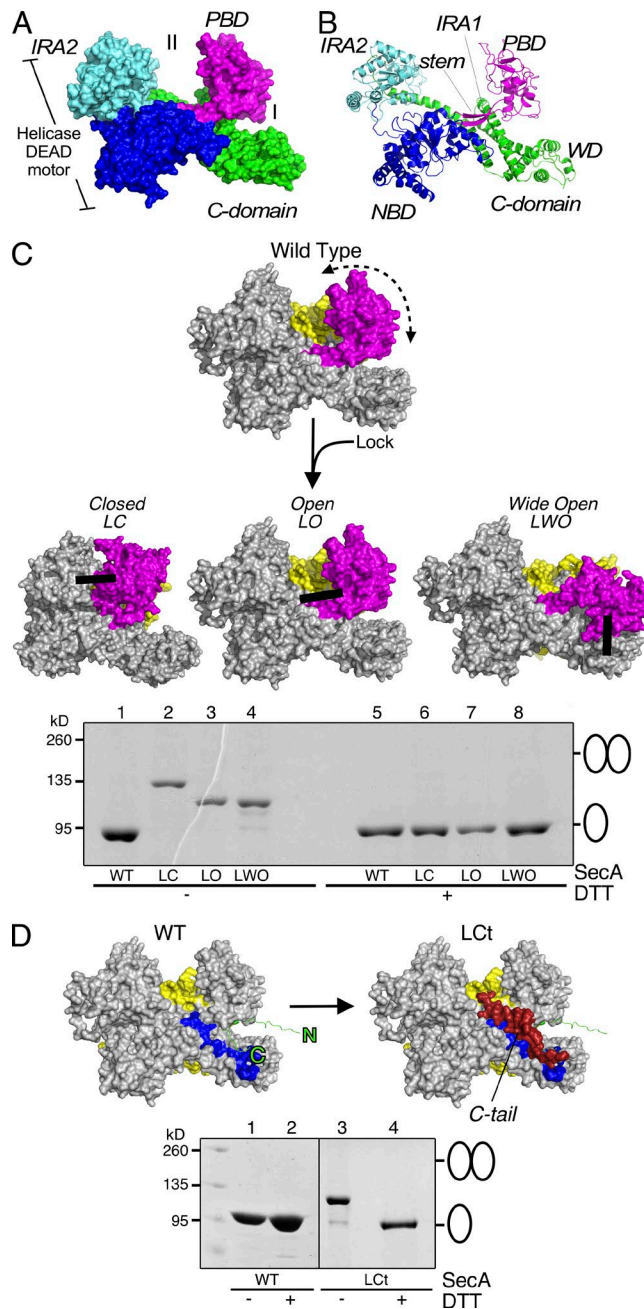

**Figure S4. PBD motions and purification of SecA with immobilized PBD domain or C-tail (related to Fig. 4).** (A and B) Surface (A) and ribbon (B) models of the *E. coli* SecA (PDB: 2FSF) in the open PBD conformation (Papanikolaou et al., 2007). The four domains of SecA are NBD (blue) and IRA2 (cyan) that form the helicase DEAD motor, PBD (purple), and the C-domain (green). Stem: the antiparallel  $\beta$ -sheet that connects the PBD to the NBD. Two apparent clamps that form as PBD swivels are indicated (I and II; see also Fig. 4). (C) Schematic presentation of the swiveling flexibility as well as the immobilization of the PBD domain of SecA in three conformational states using engineered disulfide bonds (top). Cysteines at positions K268C/I597C lock SecA in the closed conformation (LC), P301C/S809C cysteines lock SecA in the open conformation (LO), and P301C/Q830C cysteines lock SecA in the wide open conformation (LWO). SecYEG is shown in yellow. Nonreducing SDS-PAGE of the indicated purified Locked SecA derivatives (bottom). Proteins were visualized by Coomassie R-250 staining. Purified His<sub>6</sub>SecA(6–834) (K268C/I597C; LC), His<sub>6</sub>SecA(6–834) (C98A/P301C/S809C; LO) and His<sub>6</sub>SecA(6–834) (C98A/P301C/Q830C; LWO) were analyzed by nonreducing SDS-PAGE on a 7.5% wt/vol acrylamide gel. Under nonreducing conditions (lanes 2–4), all mutants migrate at an apparent molecular mass that is higher than that of the wild type (WT; lane 1). Because none of them have the molecular mass of a dimeric SecA, we concluded that the mutant proteins formed intraprotomeric disulfide bonds and migrated aberrantly during SDS-PAGE as commonly seen before (Mori and Ito, 2006; Karamanou et al., 2007). When a reducing agent is added, aberrant migration is abolished (lane 6–8) and all proteins migrate to the same position as that of the non-cross-linked protein (lane 5). (D) Schematic presentation of C-tail immobilization on SecA (top; blue, PatchA; dark red, SecA C-tail; yellow, SecYEG; green, signal peptide) using engineered disulfide bonds. Intraprotomeric cysteine oxidation of residues M191C/R850C locked the C-tail on SecA (i.e., SecA(LCt)). Purified His<sub>6</sub>SecA(6–901) (M191C/R850C; LCt) protein was analyzed on a 7.5% wt/vol acrylamide nonreducing SDS-PAGE and visualized by Coomassie R-250 staining (bottom). Under nonreducing conditions (lane 3), SecA(LCt) migrates at an apparent molecular mass that is higher than the wild type (lane 1). Because it does not have the molecular mass of a dimeric SecA, we concluded that the mutant proteins formed intraprotomeric disulfide bonds. When a reducing agent is added, aberrant migration is abolished (lane 4).

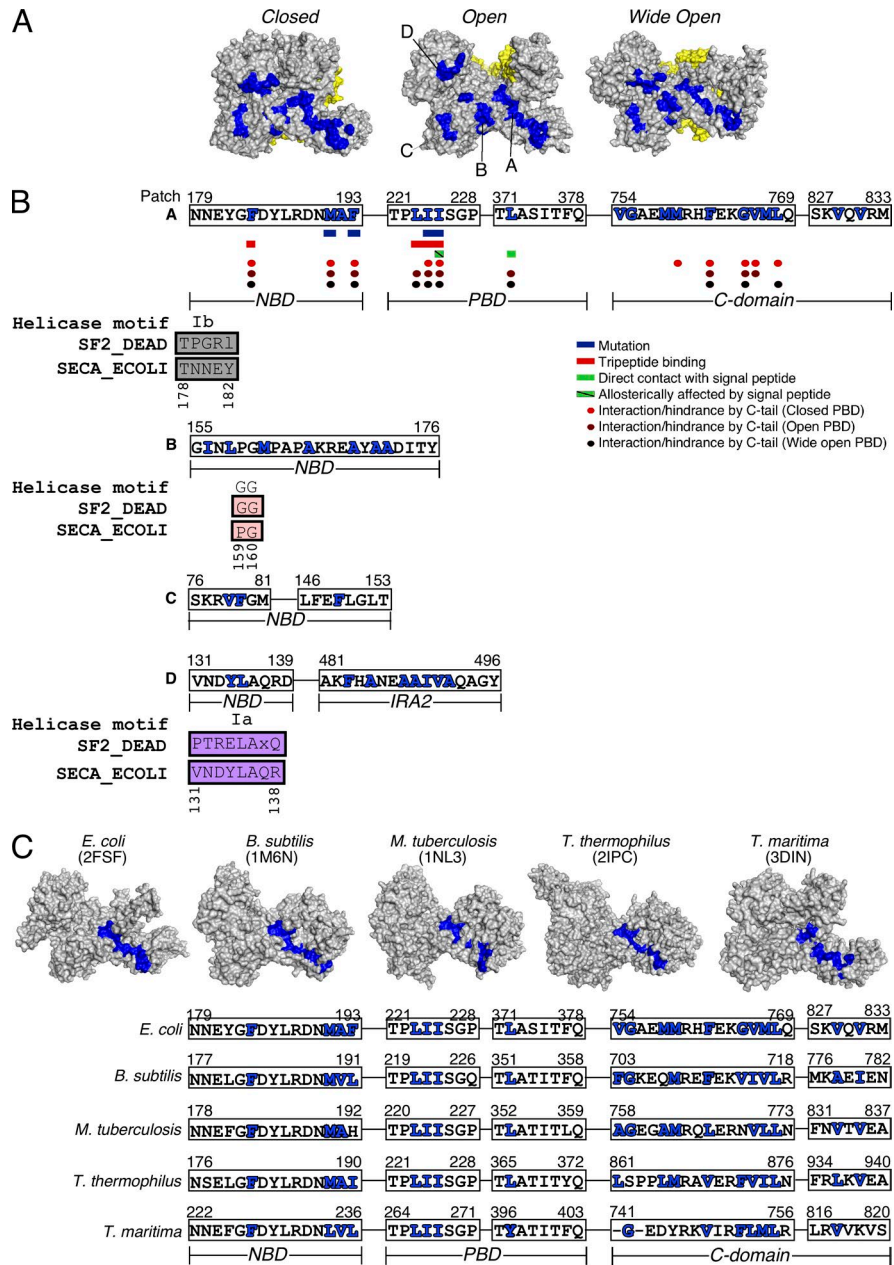

**Figure S5. Hydrophobic patches on SecA (related to Fig. 4).** (A) *E. coli* SecA models with their PBD in three distinct conformational states. The cytoplasmic face of SecA contains four patches of hydrophobic amino acids (blue; indicated as A–D) that are accessible in all PBD positions. Hence, all these potential mature domain-binding sites remain available irrespective of the PBD position. (B) The amino acids of each patch (highlighted in blue) are not next to each other in the linear polypeptide chain but come in close proximity in the 3D space and form continuous hydrophobic patches. Some of the conserved sequences, indicated in color below the Patch sequence, are characteristic DEAD RNA helicase superfamily 2 motifs (Papanikou et al., 2007) known to interact with the oligonucleotide substrate and convey allosteric cross talk to the ATPase machinery. Mutation of four PatchA residues (indicated by a blue bar under the PatchA sequence) to alanine residues in this study (SecA PatchA) disturbs the hydrophobicity continuity of PatchA (Fig. 4 G) and consequently impacts mature domain binding and preprotein secretion (Fig. 4, H–J). Four PatchA residues (indicated by a red bar) were shown to interact with a co-crystallized tripeptide (Zimmer et al., 2009). Direct and indirect (allosteric) contacts with a signal peptide in solution (Gelis et al., 2007) are indicated (see index; see also Fig. S6 D for structural details). PatchA residues that become completely or partially shielded by the SecA C-tail in the closed, open, and wide open PBD states are indicated by red, dark red, and black circles, respectively (see also Fig. S6 E for structural details). For the wide open state, interactions were identified using the *Bacillus subtilis* SecA wide open state (1M6N) as a template. 1M6N is the only available structure in which the C-tail is resolved. For the closed and open PBD states, *E. coli* models were generated for the localization of the C-tail using the *B. subtilis* SecA structure (1M6N) as a template. (C) Conservation of the hydrophobic PatchA (blue patch) on SecA in various organisms. From left to right: *E. coli* SecA (2FSF; Papanikolau et al., 2007), *B. subtilis* SecA (1M6N; Hunt et al., 2002), *Mycobacterium tuberculosis* SecA (1NL3; Sharma et al., 2003), *Thermus thermophilus* SecA (2IPC; Vassilyev et al., 2006), and *T. maritima* SecA (3DIN; Zimmer et al., 2008). The alignment of the PatchA residues for all SecAs is shown below. Most of these residues are highly conserved or have conserved hydrophobicity.

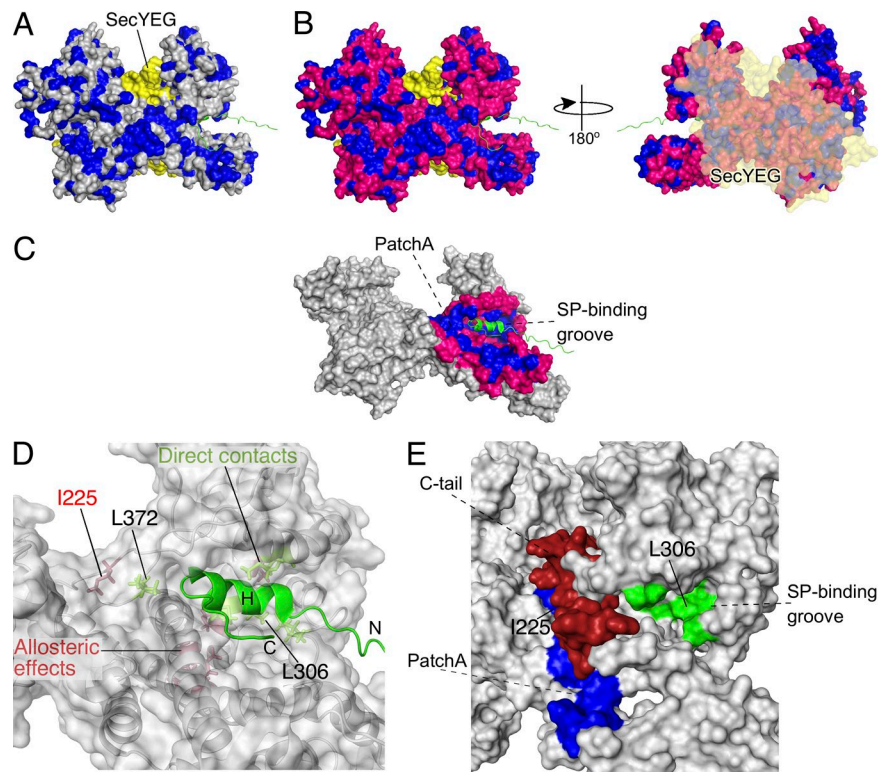

**Figure S6. SecA surface features and detailed interactions with signal peptide and C-tail (related to Fig. 4).** (A) The cytoplasmic platform of SecA (*E. coli* SecA model; as in Fig. S5 A) is enriched in nonpolar amino acids (blue; alanine, glycine, methionine, valine, leucine, isoleucine, proline, phenylalanine, tyrosine, and tryptophan). Continuous nonpolar grooves form the SecA hydrophobic patches that are proposed to be involved in binding mature domain signals (Fig. S5, A and B). (B) Polar/charged (pink) and nonpolar (blue) residues are indicated on the cytoplasmic SecA platform (left) and on the SecYEG-interacting surface of SecA (right). Only the cytoplasmic SecA platform is enriched in extensive nonpolar islands, supporting its engagement in interactions with preprotein mature domains. These hydrophobic islands, namely the SecA hydrophobic patches, are outlined by polar and charged residues that may assist MTS binding via electrostatic contacts or hydrogen bonding with polar and charged mature domain residues that surround MTSs. In contrast, polar/charged islands dominate the SecA–SecYEG interface, enabling efficient SecA docking on the mainly charged/polar cytoplasmic protrusions of SecY. (C) Non-polar (blue) and polar/charged (pink) residues are highlighted only at the proximity of the signal peptide-binding groove of SecA (PDB: 2VDA). PatchA of SecA appears as a physical continuation of the signal peptide-binding groove in an orthogonal configuration. The mainly polar C-terminal region of the engaged signal peptide lies on a polar SecA path that connects to PatchA. (D) PatchA and the signal peptide-binding site on SecA are adjacent, but not overlapping. They converge at a 90° angle, forming a characteristic L shape. The signal peptide-binding site of SecA is mainly located in the groove formed between the PBD and IRA1 domains (Gelís et al., 2007). The signal peptide (green) binds with two main components. (a) Its helical hydrophobic region (H) makes hydrophobic contacts (with M235, V239, I291, I292, M305, and L306; lime green; Gelís et al., 2007). These are the major binding contacts, and signal peptide binding is 6- to 15-fold reduced when residues I304 and L306 are mutated (Gelís et al., 2007; Gouridis et al., 2009). (b) Its positively charged N terminus (N) makes electrostatic contacts (with E289, D293, E294, and E708; not depicted; Gelís et al., 2007). The C-terminal extension of the signal peptide is the mature domain. The presence of the signal peptide-induced additional nuclear magnetic resonance–detected chemical shifts of SecA residues that are not involved in direct contacts with the signal peptide (Gelís et al., 2007). These are attributed to allosteric effects (dark red). A representative example with a strong observed nuclear magnetic resonance shift (Gelís et al., 2007) is the I225 residue of PatchA that lies >8 Å away from the closest atom of the signal peptide, and this effect is purely allosteric. Despite the proximity of PatchA and the signal peptide-binding groove, the L372 comprises the only PatchA residue that appears to directly interact with a signal peptide at the C-terminal region of the signal peptide. As the C region of the signal peptide is flexible, this interaction might be transient, and it is unknown if it occurs in the context of the preprotein, that may alter the configuration of the flexible segment. The in-solution nuclear magnetic resonance structure was performed with the signal peptide alone. (E) The C-tail of SecA occupies the PatchA but only partially occludes the signal peptide-binding site of SecA. The C-tail (dark red) makes close docking interactions with residues F184, M191, F193, L223, L224, I225, L372, F762, G765, and V766 in PatchA (blue; I225 is indicated and is buried under the C-tail; interactions were determined in *E. coli* SecA at the open state modeled based on the *B. subtilis* SecA structure (1M6N) for the localization of the C-tail; see also Fig. S5 B). Instead, the bound C-tail essentially hovers over the signal peptide cleft (green). It passes near residues that would be occupied by the C terminus of the signal peptide (see D; e.g., L372). The signal peptide cleft residues (e.g., L306) remain unhindered for interaction with the signal peptide. Other than residues close to L372 of SecA, all other residues that interact with the C-tail mostly surround but are not directly inside the signal peptide-binding groove (Gelís et al., 2007). Deletion of the C-tail can lead to fourfold increased affinity of the PhoA signal peptide for SecA in solution (Gelís et al., 2007). The reduction in signal peptide affinity when the C-tail is bound to soluble SecA is mainly because of the reduction of accessibility to the signal peptide groove rather than direct occlusion of residues.

Table S1. Secretory preproteins with weak or no apparent extensive hydrophobic patches

| Entry name (UniProt) | Entry accession (UniProt) | Gene name   | Signal peptide length (residues) | Maximum K-D hydrophobicity |
|----------------------|---------------------------|-------------|----------------------------------|----------------------------|
| YBGS_ECOLI           | POAAV6                    | <i>ybgS</i> | 24                               | 0.644                      |
| YDCA_ECOLI           | POACW4                    | <i>ycdA</i> | 20                               | 0.933                      |
| YIFL_ECOLI           | POADN6                    | <i>yifl</i> | 19                               | 0.589                      |
| YGIW_ECOLI           | POADU5                    | <i>ygiW</i> | 20                               | 0.744                      |
| YHHA_ECOLI           | POADX7                    | <i>yhhA</i> | 17                               | 0.744                      |
| HDEB_ECOLI           | POAET2                    | <i>hdeB</i> | 29                               | 1.056                      |
| PSIF_ECOLI           | POAFM4                    | <i>psiF</i> | 21                               | 0.667                      |
| MLIC_ECOLI           | P28224                    | <i>mliC</i> | 17                               | 0.533                      |
| ASR_ECOLI            | P36560                    | <i>asr</i>  | 21                               | -0.044                     |
| YQJC_ECOLI           | P42616                    | <i>yqjC</i> | 20                               | 0.2                        |
| YNCJ_ECOLI           | P64459                    | <i>yncJ</i> | 22                               | 0.122                      |
| YHDU_ECOLI           | P64619                    | <i>yhdU</i> | 30                               | 0.667                      |
| YGDL_ECOLI           | P65292                    | <i>ygdI</i> | 19                               | -0.111                     |
| YGDR_ECOLI           | P65294                    | <i>ygdR</i> | 19                               | 0.367                      |
| PLIG_ECOLI           | P76002                    | <i>pliG</i> | 22                               | 0.356                      |
| YFGL_ECOLI           | P76573                    | <i>yfgI</i> | 19                               | 0.456                      |
| YDDL_ECOLI           | P77519                    | <i>yddl</i> | 21                               | 0.422                      |
| SPY_ECOLI            | P77754                    | <i>spy</i>  | 23                               | 0.389                      |
| YICS_ECOLI           | Q2M7X4                    | <i>yicS</i> | 21                               | 0.833                      |
| YJDP_ECOLI           | Q6BEX5                    | <i>yjdp</i> | 22                               | 0.711                      |

Maximum hydrophobicity values of the Kyte–Doolittle hydrophobic profile (window: 9, linear weight variation model) of *E. coli* secretory preproteins that show weak or no apparent extensive linear hydrophobic patches, following a secretome-wide analysis. Apart from proLpp (Fig. S1, A and E), 19 more preproteins have no apparent prominent linear hydrophobic patches in their primary sequence. Most of their hydrophobicity values are lower than the one that defines a hydrophobic patch capable of acting as an MTS. The weakest such MTS signal was defined experimentally for YncJ (Figs. 1D and S1A and Materials and methods section Bioinformatics approach to define hydrophobic patches on proteins). These proteins are candidates for possessing 3D MTS signals. Three of these proteins, PliG (PDB: 4DY3), YgiW (PDB: 1NNX), and YgdR (PDB: 3FIF), have available crystal structures. We examined whether their mature domains might have 3D, noncontinuous hydrophobic recognition signals like those of Lpp (Fig. 1 E). In YgiW and PliG, there are hydrophobic surfaces created by amino acids on a  $\beta$ -sheet that could potentially also be recognized. YgdR only has very short hydrophobic surfaces of 2 aa. K-D, Kyte–Doolittle.

Table S2. Buffers used in this study

| Buffer   | Composition                                                                             |
|----------|-----------------------------------------------------------------------------------------|
| Buffer A | 50 mM Tris-Cl, pH 8.0, 0.50 M NaCl, 10% glycerol vol/vol, 5 mM imidazole                |
| Buffer B | 50 mM Tris-Cl, pH 8.0, 0.50 M NaCl, 10% glycerol vol/vol, 8 M urea, 5 mM imidazole      |
| Buffer C | 50 mM Tris-Cl, pH 8.0, 0.50 M NaCl, 10% glycerol vol/vol, 6 M urea, 5 mM imidazole      |
| Buffer D | 50 mM Tris-Cl, pH 8.0, 50 mM NaCl, 10% glycerol vol/vol, 6 M urea, 5 mM imidazole       |
| Buffer E | 50 mM Tris-Cl, pH 8.0, 50 mM NaCl, 10% glycerol vol/vol, 6 M urea, 100 mM imidazole     |
| Buffer F | 50 mM Tris-Cl, pH 8.0, 50 mM NaCl, 6 M urea, 10% glycerol vol/vol                       |
| Buffer G | 50 mM Tris-Cl, pH 8.0, 1 M NaCl, 10% glycerol vol/vol, 5 mM imidazole                   |
| Buffer H | 50 mM Tris-Cl, pH 8.0, 50 mM NaCl, 10% glycerol vol/vol, 5 mM imidazole                 |
| Buffer I | 50 mM Tris-Cl, pH 8.0, 50 mM NaCl, 10% glycerol vol/vol, 100 mM imidazole               |
| Buffer J | 50 mM Tris-Cl, pH 8.0, 50 mM NaCl, 10% glycerol vol/vol                                 |
| Buffer K | 50 mM Tris-Cl, pH 8.0, 50 mM NaCl, 50% glycerol vol/vol                                 |
| Buffer L | 50 mM Tris-Cl, pH 8.0, 50 mM NaCl                                                       |
| Buffer M | 50 mM Tris-Cl, pH 8.0, 1 M NaCl                                                         |
| Buffer N | 50 mM Tris-Cl, pH 8.0, 20% glycerol vol/vol, 10 mg/ml DNaseI, 50 mg/ml RNase, 1 mM PMSF |
| Buffer O | 50 mM Tris-Cl pH 8.0                                                                    |
| Buffer P | 50 mM Tris-Cl, pH 8.0, 20% glycerol vol/vol                                             |
| Buffer Q | 50 mM Tris-Cl, pH 8.0, 0.2 M sucrose                                                    |
| Buffer R | 50 mM Tris-Cl, pH 8.0, 50 mM KCl, 5 mM MgCl <sub>2</sub>                                |
| Buffer S | 50 mM Tris-Cl, pH 8.0, 50 mM NaCl, 6 M Urea, 1 mM DTT, 1 mM EDTA                        |
| Buffer T | 50 mM Tris-Cl, pH 8.0, 50 mM KCl, 5 mM MgCl <sub>2</sub> , 1 mg/ml BSA, 1 mM DTT        |
| Buffer U | 5 mM MOPS, pH 7.5, 5 mM NaCl                                                            |

Table S3. *E. coli* host strains used in this study

| Strain       | Description                                                                                                                                                                                                                           | Reference or source       |
|--------------|---------------------------------------------------------------------------------------------------------------------------------------------------------------------------------------------------------------------------------------|---------------------------|
| DH5 $\alpha$ | <i>fhuA2 lac(del)U169 phoA glnV44 <math>\Phi</math>80' lacZ(del)M15 gyrA96 recA1 relA1 endA1 thi-1 hsdR17</i>                                                                                                                         | Invitrogen                |
| JM109        | <i>endA1 glnV44 thi-1 relA1 gyrA96 recA1 mcrB<sup>+</sup> <math>\Delta</math>(lac-proAB) e14- [F' traD36 proAB<sup>+</sup> lac<sup>H</sup> lacZ<math>\Delta</math>M15] hsdR17(r<sub>K</sub><sup>-</sup>m<sub>K</sub><sup>+</sup>)</i> | Promega                   |
| BL21(DE3)    | <i>(F' ompT gal dcm lon hsdS<sub>B</sub>(r<sub>B</sub><sup>-</sup> m<sub>B</sub><sup>-</sup>) <math>\lambda</math>(DE3 [lacI lacUV5-T7 gene 1 ind1 sam7 nin5])</i>                                                                    | Studier et al., 1990      |
| BL21.19(DE3) | <i>secA13 (Am) supF (Ts) trp (Am) zch::Tn10 recA::cat clpA::kan</i>                                                                                                                                                                   | Mitchell and Oliver, 1993 |
| BL31(DE3)    | A BL21.19 spontaneous mutant derivative that can grow at high temperatures                                                                                                                                                            | This study                |
| MC4100       | <i>F- araD139 <math>\Phi</math>(argF-lac)U169 rpsL150 (Str<sup>R</sup>) relA1 flbB5301 deoC1 psiF25 rbsR</i>                                                                                                                          | Casadaban, 1976           |

Table S4. Cloning vectors used in this study

| Vector  | Antibiotic resistance   | Reference or source       |
|---------|-------------------------|---------------------------|
| pET5    | Ampicillin              | Studier and Moffatt, 1986 |
| pET22b+ | Ampicillin              | EMD Millipore             |
| pET16b  | Ampicillin              | EMD Millipore             |
| pBAD33  | Chloramphenicol         | Guzman et al., 1995       |
| pBAD501 | Gentamycin <sup>a</sup> | This study                |

<sup>a</sup>The gentamycin resistance gene was amplified by PCR using the Gem<sup>+</sup> plasmid pFASTBAC (Takara Bio, Inc.; a gift from T. Pugsley, Pasteur Institute, Paris, France) as a template and primers X1926 and X1927 and, following MscI-ScaI digestion, replaced the chloramphenicol resistance gene on a pBAD33 vector.

Table S5. Synthetic genes or gene fragments used in this study

| Identity                      | Gene        | Sequence before mutagenesis (5'-3')                                                                                                                                                                                                                                                                                                                                                                    | Sequence after mutagenesis (5'-3')                                                                                                                                                                                                                                                                                                                                                      |
|-------------------------------|-------------|--------------------------------------------------------------------------------------------------------------------------------------------------------------------------------------------------------------------------------------------------------------------------------------------------------------------------------------------------------------------------------------------------------|-----------------------------------------------------------------------------------------------------------------------------------------------------------------------------------------------------------------------------------------------------------------------------------------------------------------------------------------------------------------------------------------|
| SG PhoA<br>(350-471)<br>M8-11 | <i>PhoA</i> | AAACAGGATCATGCTGCGAATCCTTGTGGGCAAATGGCGAGACGGTC<br>GATCTCGATGAAGCCGTACAACGGGCGCTGGAATTCGCTAAAAGGAG<br>GGTAACACCGCTGGTCATAGTCACCGCTGATCAGCCACGCCAGCCAG<br>ATTGTTGGCCGGATACCAAAGCTCCGGCCCTCACCCAGGCGCTAAAT<br>ACCAAAGATGGCGCAGTGATGGTGATGAGTTACGGGAACCCGAAGAG<br>GATTCACAAGAACATACCGGCAGTCAGTTGCGTATTGCGCGGTATGGC<br>CCGCATGCCCAATGTTGTTGGACTGACCGACCAGACCGATCTCTTC<br>TACACCATGAAAGCCGCTCTGGGGCTGAAATAA | AAACAGGATCATGCTGCGAATCCTTGTGGGCAAATGGCGAGACG<br>GTCGATCTCGATGAAGCCGTACAACGGGCGACCGAAGCGGCT<br>AAAAAGGAGGGTAAACACGGCGACCGGACCCGCTGATCAC<br>GCCACGCCAGCCAGACCACCGCGGATACCAAAGCTCCG<br>GGCACCACCGGCGACCAATACCAAAGATGGCGCAACCACC<br>GGAGTACCGGGAACCCGAAGAGGATTCACAAGAACATACCGGC<br>AGTCAGGCGGTCACCGCGGACCGGCGCCGATGCCGCAATCGC<br>ACCGAACCACCGACCAGACCGATACCGGACCCATGAAACC<br>ACCACCGGACCATG |
| SG HdeA<br>(noMTS)            | <i>HdeA</i> | AAAAAAGTATTAGCGTTATTCTTGGTGGTCTGCTTCTTCTGCCAGTT<br>GTGAGCAATGCAGCGGATGCGCAAAAAGCAGCTGATAACAAAAACCG<br>GTCAACTCCTGGACCTGTGAAGATTTCTGGCTGTGGACGAATCCTTC<br>CAGCCAACTGCAGTTGGTTTTGCTGAAGCGCTGAACAACAAAGATAAA<br>CCAGAAGATGCGGTTTTAGATGTTGAGGATTTGCAACCGTAACCCCA<br>GCTATCGTTGAGCTTGTACTCAGGATAAACAAGCCAACCTTTAAAGAT<br>AAAGTTAAAGCGAATGGGACAAAATTAAGAAAGATATGTAA                                          | AAAAAAGTATTAGCGTTATTCTTGGTGGTCTGCTTCTTCTGCCA<br>GTTGTGAGCAATGCAGCGGATGCGCAAAAAGCAGCTGATAACAAA<br>AAACCGTCAACTCCTGGACCTGTGAAGATGCGACCGCTCGGAC<br>GAATCCACCGCAACTGCAACCGGTACCGCTGAAGCGGCGAAC<br>AACAAAGATAAACAGAAGATGCGACCCAGATGCGCAG<br>GGTACCGCAACCGGACCCAGCTACCGCGCAGGCTTGTACTCAG<br>GATAAACAAGCCAACCTTTAAAGATAAAGTTAAAGCGAATGGGAC<br>AAAATTAAGAAAGATATGATG                            |
| SG YncJ<br>(noMTS)            | <i>YncJ</i> | TTTACGAAGGCGTTATCGGTTGTCTTATTAACGTGTGCTCTGTTTTCA<br>GGACAACCTCATGGCAGGGCACAAAGGACATGAATTTGTGGGTAAG<br>AATGTGGATCATCAGCTGCGTCATGAAGCGGACAGCGATGAATTGCGT<br>GCTGTGGCGGAAGAGTCGGCGAAGTTTTGCGCGAGCATTTTTACTGG<br>CAAAAATCGCGCAAACCGAAGCGGACAAACGTTGA                                                                                                                                                       | TTTACGAAGGCGTTATCGGTTGTCTTATTAACGTGTGCTCTGTTT<br>TCAGGCAACTCATGGCAGGGCACAAAGGACATGAAACCGCG<br>ACCACCAAGAAATGCGGATCATCAGCTGCGTCATGAAGCGGACAGC<br>GATGAAGCGGCTGTACTCCGCGAAGAGTCGGCGAAGGTTTTGCGC<br>GAGCATTTTTACTGGCAAAAATCGCGCAAACCGAAGCGGACAA<br>CGTATGATG                                                                                                                               |

The following genes or gene fragments (as indicated) carrying multiple mutations (shown in bold) were produced by Integrated DNA Technologies (IDN) and delivered as pUCIDT(Amp) clones. The NdeI-XhoI restriction sites (underlined) were subcloned in pET22b.



Table S6. Genetic constructs used in this study

| Gene                                     | UniProt KB accession number | Plasmid name | Vector  | Cloning/PCR strategy or source                                                                                                                                                                                                                                                                                   |
|------------------------------------------|-----------------------------|--------------|---------|------------------------------------------------------------------------------------------------------------------------------------------------------------------------------------------------------------------------------------------------------------------------------------------------------------------|
| <b>Preproteins and their derivatives</b> |                             |              |         |                                                                                                                                                                                                                                                                                                                  |
| <i>proBglX</i>                           | P33363 (proBglX)            | pIMBB1036    | pET22b  | Gouridis et al., 2009                                                                                                                                                                                                                                                                                            |
| <i>BglX</i>                              | P33363 (proBglX)            | pIMBB1037    | pET22b  | Gouridis et al., 2009                                                                                                                                                                                                                                                                                            |
| <i>proBglX(1-132)</i>                    | P33363 (proBglX)            | pIMBB1229    | pET22b  | The fragment amplified from pIMBB1036 using X732 and X994 primers was NdeI-XhoI digested and cloned to the corresponding vector sites                                                                                                                                                                            |
| <i>BglX(21-132)</i>                      | P33363 (proBglX)            | pIMBB1230    | pET22b  | The fragment amplified from pIMBB1036 using X734 and X994 primers, was NdeI-XhoI digested and cloned to the corresponding vector sites                                                                                                                                                                           |
| <i>proAmy1</i>                           | P25718 (proAmy1)            | pIMBB1044    | pET22b  | Gouridis et al., 2009                                                                                                                                                                                                                                                                                            |
| <i>Amy1</i>                              | P25718 (proAmy1)            | pIMBB1045    | pET22b  | Gouridis et al., 2009                                                                                                                                                                                                                                                                                            |
| <i>proAmy1(1-131)</i>                    | P25718 (proAmy1)            | pIMBB1227    | pET22b  | The fragment amplified from pIMBB1044 using X744 and X995 primers was NdeI-XhoI digested and cloned to the corresponding vector sites                                                                                                                                                                            |
| <i>Amy1(18-131)</i>                      | P25718 (proAmy1)            | pIMBB1228    | pET22b  | The fragment amplified from pIMBB1044 using X746 and X995 primers was NdeI-XhoI digested and cloned to the corresponding vector sites                                                                                                                                                                            |
| <i>proPhoA</i>                           | P00634 (proPhoA)            | pIMBB882     | pET22b  | Gouridis et al., 2009                                                                                                                                                                                                                                                                                            |
| <i>proPhoA</i>                           | P00634 (proPhoA)            | pIMBB1081    | pET22b  | The fragment amplified from pIMBB882 using X560 and X807 primers was NdeI-HindIII digested and replaced the corresponding fragment in pIMBB1082                                                                                                                                                                  |
| <i>proPhoA(cys-)</i>                     | P00634 (proPhoA)            | pIMBB977     | pET22b  | Cysteins were mutated to alanines using the Quick-Change Mutagenesis protocol (Agilent Technologies), pIMBB882 template, and the primer pairs X678/X679, X680/X681, X682/X683, and X684/X685                                                                                                                     |
| <i>proPhoA</i>                           | P00634 (proPhoA)            | pIMBB932     | pBAD33  | Gouridis et al., 2013                                                                                                                                                                                                                                                                                            |
| <i>proPhoA</i>                           | P00634 (proPhoA)            | pIMBB1570    | pBAD501 | The KpnI-HindIII <i>proPhoA</i> fragment from pIMBB932 was subcloned into the corresponding sites of pBAD501, the HindIII site was destroyed by PCR mutagenesis using the primer pair X1915/X1916, and the NdeI-XhoI fragment of the resulting plasmid was replaced by the corresponding fragment from pIMBB1081 |
| <i>PhoA</i>                              | P00634 (proPhoA)            | pIMBB1080    | pET22b  | The fragment amplified from pIMBB882 using X806 and X561 primers was NdeI-XhoI digested and cloned to the corresponding vector sites                                                                                                                                                                             |
| <i>PhoA(cys-)</i>                        | P00634 (proPhoA)            | pIMBB1052    | pET22b  | The 1,347-bp fragment (mature domain without Arg22) was isolated by PCR using template pIMBB977 ( <i>proPhoA</i> His $\Delta$ cys pET22b) and primers X646 (Forw NdeI) and X561 (Rev XhoI), and the PCR product was digested by NdeI-XhoI and cloned to the same sites of pET22b                                 |
| <i>proPhoA(1-122)</i>                    | P00634 (proPhoA)            | pIMBB1203    | pET22b  | The fragment amplified from pIMBB1081 using X560 and X728 primers was NdeI-XhoI digested and cloned to the corresponding vector sites                                                                                                                                                                            |
| <i>PhoA(23-122)</i>                      | P00634 (proPhoA)            | pIMBB1183    | pET22b  | The fragment amplified from pIMBB882 using X806 and X936 primers was NdeI-XhoI digested and cloned to the corresponding vector sites                                                                                                                                                                             |
| <i>proPhoA(1-82)</i>                     | P00634 (proPhoA)            | pIMBB1002    | pET22b  | The fragment amplified from pIMBB882 using X560 and X729 primers was NdeI-XhoI digested and cloned to the corresponding vector sites                                                                                                                                                                             |
| <i>proPhoA(1-78)</i>                     | P00634 (proPhoA)            | pIMBB1152    | pET22b  | The fragment amplified from pIMBB977 using X560 and Ming Tao's (Rev XhoI) primers was NdeI-XhoI digested and cloned to the corresponding vector sites                                                                                                                                                            |
| <i>proPhoA(1-62)</i>                     | P00634 (proPhoA)            | pIMBB1001    | pET22b  | Gouridis et al., 2009                                                                                                                                                                                                                                                                                            |
| <i>proPhoA(1-50)</i>                     | P00634 (proPhoA)            | pIMBB1151    | pET22b  | The fragment amplified by pIMBB977 using X560 and X928 primers was NdeI-XhoI digested and cloned to the corresponding vector sites                                                                                                                                                                               |
| <i>proPhoA(1-40)</i>                     | P00634 (proPhoA)            | pIMBB1150    | pET22b  | The fragment amplified from pIMBB977 using X560 and X927 primers was NdeI-XhoI digested and cloned to the corresponding vector sites                                                                                                                                                                             |

Table S6. Genetic constructs used in this study (Continued)

| Gene                         | UniProt KB accession number | Plasmid name | Vector | Cloning/PCR strategy or source                                                                                                                                                                                                                                                                                                                       |
|------------------------------|-----------------------------|--------------|--------|------------------------------------------------------------------------------------------------------------------------------------------------------------------------------------------------------------------------------------------------------------------------------------------------------------------------------------------------------|
| <i>proPhoA(1-30)</i>         | P00634 (proPhoA)            | pIMBB1149    | pET22b | The fragment amplified from pIMBB977 using X560 and X926 primers was NdeI-XhoI digested and cloned to the corresponding vector sites                                                                                                                                                                                                                 |
| <i>proPhoA M1</i>            | P00634 (proPhoA)            | pIMBB1355    | pET22b | Quick Change Mutagenesis PCR System (Agilent Technologies) using pIMBB882 template and the mutagenic primer pairs X1058/X1059 and X1060/X1061                                                                                                                                                                                                        |
| <i>proPhoA(1-122)M1</i>      | P00634 (proPhoA)            | pIMBB1358    | pET22b | The fragment amplified by pIMBB1355 using X560 and X1146 primers was NdeI-XhoI digested and cloned to the corresponding vector sites                                                                                                                                                                                                                 |
| <i>PhoA(23-122)M1</i>        | P00634 (proPhoA)            | pIMBB1364    | pET22b | The fragment amplified from pIMBB1358 using X646 and X1146 primers was NdeI-XhoI digested and cloned to the corresponding vector sites                                                                                                                                                                                                               |
| <i>proPhoA M2</i>            | P00634 (proPhoA)            | pIMBB1356    | pET22b | Quick Change Mutagenesis PCR System (Agilent Technologies) using pIMBB882 template and the mutagenic primer pairs X1062/X1063, X1064/X1065, and X1066/X1067                                                                                                                                                                                          |
| <i>proPhoA(1-122)M2</i>      | P00634 (proPhoA)            | pIMBB1359    | pET22b | The fragment amplified from pIMBB1356 using X560 and X1146 primers was NdeI-XhoI digested and cloned to the corresponding vector sites                                                                                                                                                                                                               |
| <i>PhoA(23-122)M2</i>        | P00634 (proPhoA)            | pIMBB1365    | pET22b | The fragment amplified from pIMBB1359 using X646 and X1146 primers was NdeI-XhoI digested and cloned to the corresponding vector sites                                                                                                                                                                                                               |
| <i>proPhoA M1, M2</i>        | P00634 (proPhoA)            | pIMBB1357    | pET22b | Quick Change Mutagenesis PCR System (Agilent Technologies) using pIMBB882 template and the mutagenic primer pairs: X1058/X1059, X1060/X1061, X1062/X1063, X1064/X1065, and X1066/X1067                                                                                                                                                               |
| <i>proPhoA(1-122)M1, M2</i>  | P00634 (proPhoA)            | pIMBB1360    | pET22b | The fragment amplified from pIMBB1357 using X560 and X1146 primers was NdeI-XhoI digested and cloned to the corresponding vector sites                                                                                                                                                                                                               |
| <i>PhoA(23-122) M1, M2</i>   | P00634 (proPhoA)            | pIMBB1366    | pET22b | The fragment amplified from pIMBB1360 using X646 and X1146 primers was NdeI-XhoI digested and cloned to the corresponding vector sites                                                                                                                                                                                                               |
| <i>proPhoA(123-471)</i>      | P00634 (proPhoA)            | pIMBB1234    | pET22b | pIMBB1081 was HindIII-XhoI digested; the vector was isolated and ligated to the HindIII-XhoI fragment that was amplified from pIMBB1081 using X998 and X561 primers                                                                                                                                                                                  |
| <i>PhoA(123-471)</i>         | P00634 (proPhoA)            | pIMBB1235    | pET22b | The fragment amplified from pIMBB882 using X999 and X561 primers was NdeI-XhoI digested and cloned to the corresponding vector sites                                                                                                                                                                                                                 |
| <i>proPhoA(250-471)</i>      | P00634 (proPhoA)            | pIMBB1361    | pET22b | pIMBB1081 was HindIII-XhoI digested; the vector was isolated and ligated to the HindIII-XhoI fragment that was amplified from pIMBB1081 using X1068 and X561 primers                                                                                                                                                                                 |
| <i>PhoA(250-471)</i>         | P00634 (proPhoA)            | pIMBB1434    | pET22b | The fragment amplified by colony PCR from BL21.19 strain using X1184 and X561 primers was NdeI-XhoI digested and cloned to the corresponding vector sites                                                                                                                                                                                            |
| <i>proPhoA(350-471)</i>      | P00634 (proPhoA)            | pIMBB1362    | pET22b | pIMBB1081 was HindIII-XhoI digested; the vector was isolated and ligated to the HindIII-XhoI fragment amplified from pIMBB1081 using X1069 and X561 primers                                                                                                                                                                                          |
| <i>PhoA(350-471)</i>         | P00634 (proPhoA)            | pIMBB1435    | pET22b | The fragment amplified by colony PCR from BL21.19 strain using X1185 and X561 primers was NdeI-XhoI digested and cloned to the corresponding vector sites                                                                                                                                                                                            |
| <i>proPhoA(350-471)M8-11</i> | P00634 (proPhoA)            | pIMBB1532    | pET22b | The fragment amplified from pIMBB1531 using X1069 and X1572 primers was HindIII-XhoI digested and replaced the corresponding fragment on pIMBB1081                                                                                                                                                                                                   |
| <i>PhoA(350-471)M8-11</i>    | P00634 (proPhoA)            | pIMBB1531    | pET22b | The NdeI/XhoI digested fragment from IDT vector SG PhoAM8-11 was subcloned to the corresponding vector sites                                                                                                                                                                                                                                         |
| XXXX-PhoA                    | P00634                      | pIMBB1082    | pET22b | This construct was created for cloning convenience. A 1.7-kb NdeI-HindIII fragment was cloned to the corresponding sites of pET22b, resulting in pET22b/XXXX-His. To the HindIII-XhoI sites of this construct the MD of PhoA was cloned following digestion by HindIII-XhoI of the PCR fragment amplified from pIMBB882 using primers X781 and X561. |
| <i>proPpiA</i>               | POAFL3 (proPpiA)            | pIMBB1042    | pET22b | Gouridis et al., 2009                                                                                                                                                                                                                                                                                                                                |
| <i>PpiA</i>                  | POAFL3 (proPpiA)            | pIMBB1043    | pET22b | Gouridis et al., 2009                                                                                                                                                                                                                                                                                                                                |
| <i>proPpiA(1-125)</i>        | POAFL3 (proPpiA)            | pIMBB1225    | pET22b | The fragment amplified from pIMBB1042 using X741 and X993 primers was NdeI-XhoI digested and cloned to the corresponding vector sites                                                                                                                                                                                                                |

Table S6. **Genetic constructs used in this study** (Continued)

| Gene                        | UniProt KB accession number | Plasmid name | Vector  | Cloning/PCR strategy or source                                                                                                                                                                                                                 |
|-----------------------------|-----------------------------|--------------|---------|------------------------------------------------------------------------------------------------------------------------------------------------------------------------------------------------------------------------------------------------|
| <i>PpiA</i> (25-125)        | POAFL3 (proPpiA)            | pIMBB1226    | pET22b  | The fragment amplified from pIMBB1042 using X743 and X993 primers was NdeI-XhoI digested and cloned to the corresponding vector sites                                                                                                          |
| <i>proSpy</i>               | P77754 (proSpy)             | pIMBB1331    | pET22b  | The fragment amplified by colony PCR from BL21.19 <i>E. coli</i> strain using X1128 and X1129 primers was NdeI-XhoI digested and cloned to the corresponding vector sites                                                                      |
| <i>Spy</i>                  | P77754 (proSpy)             | pIMBB1332    | pET22b  | The fragment amplified by colony PCR from BL21.19 <i>E. coli</i> strain using X1130 and X1129 primers was NdeI-XhoI digested and cloned to the corresponding vector sites                                                                      |
| <i>proYehR</i>              | P33354 (proYehR)            | pIMBB1034    | pET22b  | The fragment amplified by colony PCR from JM109 <i>E. coli</i> strain using X771 and X772 primers was NdeI-XhoI digested and cloned to the corresponding vector sites                                                                          |
| <i>YehR</i>                 | P33354 (proYehR)            | pIMBB1035    | pET22b  | The fragment amplified by colony PCR from JM109 <i>E. coli</i> strain using X773 and X772 primers was NdeI-XhoI digested and cloned to the corresponding vector sites                                                                          |
| <i>proHdeA</i>              | POAES9 (proHdeA)            | pIMBB1483    | pET22b  | The fragment amplified by colony PCR from DH5a <i>E. coli</i> strain using X1393 and X1394 primers was NdeI-XhoI digested and cloned to the corresponding vector sites                                                                         |
| <i>HdeA</i>                 | POAES9 (proHdeA)            | pIMBB1489    | pET22b  | The fragment amplified by colony PCR from DH5a <i>E. coli</i> strain using X1395 and X1394 primers was NdeI-XhoI digested and cloned to the corresponding vector sites                                                                         |
| <i>proHdeA</i> (noMTS)      | POAES9 (proHdeA)            | pIMBB1527    | pET22b  | The NdeI/XhoI digested fragment from IDT vector SG HdeA(noMTS) was cloned to the corresponding vector sites                                                                                                                                    |
| <i>HdeA</i> (noMTS)         | POAES9 (proHdeA)            | pIMBB1528    | pET22b  | The fragment amplified from the IDT vector SG HdeA(noMTS) using X1395 and X1571 primers was NdeI-XhoI digested and cloned to the corresponding vector sites                                                                                    |
| <i>proLpp</i>               | P69776 (proLpp)             | pIMBB1321    | pET22b  | The fragment amplified by colony PCR from BL21.19 <i>E. coli</i> strain using X1081 and X1082 primers was NdeI-XhoI digested and cloned to the corresponding vector sites                                                                      |
| <i>proLpp</i> (C21A)        | P69776 (proLpp)             | pIMBB1322    | pET22b  | The mutation C21A was introduced using Quick Change PCR Mutagenesis protocol, pIMBB1321 template, and mutagenic primers X1075 and X1076                                                                                                        |
| <i>proLpp</i> (C21A)(noMTS) | P69776 (proLpp)             | pIMBB1425    | pET22b  | The mutations were introduced using the Quick-Change Mutagenesis protocol, pIMBB1322 template and mutagenic primer pairs X1188/X1189, X1190/X1191, X1192/X1193, X1194/X1195, X1196/X1197, X1198/X1199, X1200/X1201, X1202/1203, and X1204/1205 |
| <i>Lpp</i> (C21A)(noMTS)    | P69776 (proLpp)             | pIMBB1426    | pET22b  | The fragment amplified from pIMBB1425 using X1171 and X1082 primers was NdeI-XhoI digested and cloned to the corresponding vector sites                                                                                                        |
| <i>proYncJ</i>              | P64459 (proYncJ)            | pIMBB1485    | pET22b  | The fragment amplified by colony PCR from DH5a <i>E. coli</i> strain using X1422 and X1423 primers was NdeI-XhoI digested and cloned to the corresponding vector sites                                                                         |
| <i>YncJ</i>                 | P64459 (proYncJ)            | pIMBB1491    | pET22b  | The fragment amplified by colony PCR from DH5a <i>E. coli</i> strain using X1424 and X1423 primers was NdeI-XhoI digested and cloned to the corresponding vector sites                                                                         |
| <i>proYncJ</i> (noMTS)      | P64459 (proYncJ)            | pIMBB1524    | pET22b  | The NdeI-XhoI digested fragment from IDT vector SG YncJ(noMTS) was cloned to the corresponding vector sites                                                                                                                                    |
| <i>YncJ</i> (noMTS)         | P64459 (proYncJ)            | pIMBB1525    | pET22b  | The fragment amplified from the IDT vector SG YncJ(noMTS) using X1424 and X1570 primers was NdeI-XhoI digested and cloned to the corresponding vector sites                                                                                    |
| <i>proYncJ-PhoA</i>         | P64459 (proYncJ)            | pIMBB1618    | pBAD501 | The fragment amplified by colony PCR from <i>E. coli</i> strain DH5a using primers X1422 and X1973 was NdeI-HindIII digested and cloned to the corresponding sites of pIMBB1570                                                                |
| <i>proYncJ</i> (noMTS)-PhoA | P64459 (proYncJ)            | pIMBB1616    | pBAD501 | The proYncJ(noMTS) fragment amplified by PCR from pIMBB1524 using primers X1422 and X1973, was NdeI-HindIII digested and cloned to the corresponding sites of pIMBB1570                                                                        |
| <i>proOsmB</i>              | POADA7 (proOsmB)            | pIMBB1024    | pET22b  | The fragment amplified by colony PCR from JM109 <i>E. coli</i> strain using X756 and X757 primers was NdeI-XhoI digested and cloned to the corresponding vector sites                                                                          |
| <i>proOsmB</i> (C24A)       | POADA7 (proOsmB)            | pIMBB1319    | pET22b  | C24A was introduced by Quick Change PCR Mutagenesis System (Agilent Technologies) using pIMBB1024 template and the mutagenic primers X1048 and X1049                                                                                           |
| <i>OsmB</i>                 | POADA7 (proOsmB)            | pIMBB1025    | pET22b  | The fragment amplified by colony PCR from JM109 <i>E. coli</i> strain using X758 and X757 primers was NdeI-XhoI digested and cloned to the corresponding vector sites                                                                          |

Table S6. Genetic constructs used in this study (Continued)

| Gene                                                 | UniProt KB accession number | Plasmid name | Vector | Cloning/PCR strategy or source                                                                                                                                               |
|------------------------------------------------------|-----------------------------|--------------|--------|------------------------------------------------------------------------------------------------------------------------------------------------------------------------------|
| OsmB(C24A)                                           | POADA7 (proOsmB)            | pIMBB1320    | pET22b | The fragment amplified by colony PCR from BL21.19 <i>E. coli</i> strain using X1077 and X757 primers was NdeI-XhoI digested and cloned to the corresponding vector sites     |
| <b>secA and derivatives</b>                          |                             |              |        |                                                                                                                                                                              |
| secA(1-901)                                          | P10408 (SecA)               | pIMBB10      | pET5   | Karamanou et al., 1999                                                                                                                                                       |
| secA(6-901)                                          | P10408 (SecA)               | pIMBB7       | pET5   | Karamanou et al., 1999                                                                                                                                                       |
| secA (3cys-) (6-901)                                 | P10408 (SecA)               | pIMBB258     | pET5   | The 2.5-kb NcoI fragment from pT7-7 (a gift from D. Oliver, Wesleyan University, Middletown, CT) replaced the corresponding fragment in pIMBB7                               |
| secA(6-901)(M191C/R850C) or secA Lct                 | P10408 (SecA)               | pIMBB987     | pET5   | The M191C and R850C mutations were introduced using the Quick Change Mutagenesis protocol, pIMBB258 template, and mutagenic primers X706-X707 and X722-X723                  |
| secA(9-901)                                          | P10408 (SecA)               | pIMBB261     | pET16b | The fragment amplified from pIMBB10 using X178 and X131 primers was NdeI-BamHI digested and cloned to the corresponding vector sites                                         |
| secA(9-834)                                          | P10408 (SecA)               | pIMBB552     | pET16b | The fragment amplified from pIMBB10 using X272 and X107 primers was KpnI-BamHI digested and cloned to the corresponding sites of pIMBB261                                    |
| secA(9-834) (Q830C)                                  | P10408 (SecA)               | pIMBB796     | pET16b | The Q830C mutation was introduced using the Quick Change Mutagenesis Protocol, pIMBB552 template, and mutagenic primers X649-X650                                            |
| secA(6-834)                                          | P10408 (SecA)               | pIMBB798     | pET5   | The 2019bp AsuI-SspI fragment of pIMBB7 was replaced by the corresponding fragment from pIMBB552                                                                             |
| secA(6-834) (C98A)                                   | P10408 (SecA)               | pIMBB834     | pET5   | The C98A mutation was introduced using the Quick Change Mutagenesis protocol, pIMBB798 template, and the mutagenic primers X534 and X535                                     |
| secA(6-834) (S809C)                                  | P10408 (SecA)               | pIMBB808     | pET5   | The S809C mutation was introduced using the Quick Change Mutagenesis protocol, pIMBB798 template, and the mutagenic primers X434 and X435                                    |
| secA(6-834) (P301C/S809C)                            | P10408 (SecA)               | pIMBB815     | pET5   | The P301C mutation was introduced using the Quick Change Mutagenesis protocol, pIMBB808 template, and the mutagenic primers X442 and X443                                    |
| secA(6-834) (C98A/P301C/S809C) or secA LO            | P10408 (SecA)               | pIMBB941     | pET5   | The C98A mutation was introduced using the Quick Change Mutagenesis protocol, pIMBB815 template, and the mutagenic primers X534 and X535                                     |
| secA(6-834) (Q830C)                                  | P10408 (SecA)               | pIMBB799     | pET5   | The 2019bp AsuI-SspI fragment of pIMBB7 was replaced by the corresponding fragment from pIMBB796                                                                             |
| secA(6-834) (P301C/Q830C)                            | P10408 (SecA)               | pIMBB812     | pET5   | The P301C mutation was introduced using the Quick Change Mutagenesis protocol, pIMBB799 template, and mutagenic primers X442 and X443                                        |
| secA(6-834) (C98A/P301C/Q830C) or secA IWO           | P10408 (SecA)               | pIMBB942     | pET5   | The C98A mutation was introduced using the Quick Change Mutagenesis protocol, pIMBB812 template, and mutagenic primers X534 and X535                                         |
| secA(6-834) (K268C/I597C) or secA LC                 | P10408 (SecA)               | pIMBB1394    | pET5   | The K268C and I597C mutations were introduced using the Quick Change Mutagenesis protocol, pIMBB798 template, and mutagenic primers X1032-X1033 and X1040-X1041              |
| secA(6-834) (M191A/F193A)                            | P10408 (SecA)               | pLMB0110     | pET16b | The M191A and F193A mutations were introduced using the Quick Change mutagenesis protocol (Agilent Technologies), pIMBB798 template, and the mutagenic primers X1958-X1959   |
| secA(6-834) (M191A/F193A/I224A/I225A) or secA PatchA | P10408 (SecA)               | pLMB1666     | pET16b | The I224A and I225A mutations were introduced using the Quick Change Mutagenesis PCR System (Agilent Technologies), pLMB0110 template, and the mutagenic primers X1954-X1955 |
| <b>secYEG and derivatives</b>                        |                             |              |        |                                                                                                                                                                              |
| secYEG                                               |                             | pET610       |        | A gift from A. Driesssen, University of Groningen, Groningen, Netherlands (van der Does et al., 1996).                                                                       |

Genes were cloned in plasmid vectors using mapped restriction sites (as indicated). Mutations were introduced using protocols, templates, and primers (as indicated). Restriction enzymes, dNTPs, and T4 DNA ligase were either from Minotech (Greece), Promega, or New England Biolabs, Inc. For mutagenesis PCR reactions, Pfu Ultra Polymerase (Agilent Technologies) was used; for gene amplification either Expand High fidelity Polymerase (Roche) or DNA Taq polymerase (Thermo Fisher Scientific). DpnI was used to cleave the maternal methylated DNA (R0176S; New England Biolabs, Inc.) according to the QuickChange Site-Directed Mutagenesis protocol (<http://www.genomics.agilent.com>; Agilent Technologies). Plasmids were transformed in DH5 $\alpha$  cells. Sequencing was performed by Macrogen.

Provided online are three tables in a PDF. Table S7 shows primers used in this study. Table S8 shows the predicted hydrodynamic radii of secretory proteins that use the Sec secretion system. Table S9 provides the sequences of proPhoA peptides used in the peptide arrays shown in Figs. 1 C and S2 A.

## References

- Casadaban, M.J. 1976. Transposition and fusion of the lac genes to selected promoters in *Escherichia coli* using bacteriophage lambda and Mu. *J. Mol. Biol.* 104:541–555. [http://dx.doi.org/10.1016/0022-2836\(76\)90119-4](http://dx.doi.org/10.1016/0022-2836(76)90119-4)
- Gelis, I., A.M. Bonvin, D. Keramisanou, M. Koukaki, G. Gouridis, S. Karamanou, A. Economou, and C.G. Kalodimos. 2007. Structural basis for signal-sequence recognition by the translocase motor SecA as determined by NMR. *Cell.* 131:756–769. <http://dx.doi.org/10.1016/j.cell.2007.09.039>
- Gouridis, G., S. Karamanou, I. Gelis, C.G. Kalodimos, and A. Economou. 2009. Signal peptides are allosteric activators of the protein translocase. *Nature.* 462:363–367. <http://dx.doi.org/10.1038/nature08559>
- Gouridis, G., S. Karamanou, M.F. Sardis, M.A. Schäfer, G. Capitani, and A. Economou. 2013. Quaternary dynamics of the SecA motor drive translocase catalysis. *Mol. Cell.* 52:655–666. <http://dx.doi.org/10.1016/j.molcel.2013.10.036>
- Guzman, L.M., D. Belin, M.J. Carson, and J. Beckwith. 1995. Tight regulation, modulation, and high-level expression by vectors containing the arabinose PBAD promoter. *J. Bacteriol.* 177:4121–4130. <http://dx.doi.org/10.1128/jb.177.14.4121-4130.1995>
- Huang, C., P. Rossi, T. Saio, and C.G. Kalodimos. 2016. Structural basis for the antifolding activity of a molecular chaperone. *Nature.* 537:202–206. <http://dx.doi.org/10.1038/nature18965>
- Hunt, J.F., S. Weinkauff, L. Henry, J.J. Fak, P. McNicholas, D.B. Oliver, and J. Deisenhofer. 2002. Nucleotide control of interdomain interactions in the conformational reaction cycle of SecA. *Science.* 297:2018–2026. <http://dx.doi.org/10.1126/science.1074424>
- Karamanou, S., E. Vrontou, G. Sianidis, C. Baud, T. Roos, A. Kuhn, A.S. Politou, and A. Economou. 1999. A molecular switch in SecA protein couples ATP hydrolysis to protein translocation. *Mol. Microbiol.* 34:1133–1145. <http://dx.doi.org/10.1046/j.1365-2958.1999.01686.x>
- Karamanou, S., G. Gouridis, E. Papanikou, G. Sianidis, I. Gelis, D. Keramisanou, E. Vrontou, C.G. Kalodimos, and A. Economou. 2007. Preprotein-controlled catalysis in the helicase motor of SecA. *EMBO J.* 26:2904–2914. <http://dx.doi.org/10.1038/sj.emboj.7601721>
- Knoblauch, N.T., S. Rüdiger, H.J. Schönfeld, A.J. Driessen, J. Schneider-Mergener, and B. Bukau. 1999. Substrate specificity of the SecB chaperone. *J. Biol. Chem.* 274:34219–34225. <http://dx.doi.org/10.1074/jbc.274.48.34219>
- Mitchell, C., and D. Oliver. 1993. Two distinct ATP-binding domains are needed to promote protein export by *Escherichia coli* SecA ATPase. *Mol. Microbiol.* 10:483–497. <http://dx.doi.org/10.1111/j.1365-2958.1993.tb00921.x>
- Mori, H., and K. Ito. 2006. The long alpha-helix of SecA is important for the ATPase coupling of translocation. *J. Biol. Chem.* 281:36249–36256. <http://dx.doi.org/10.1074/jbc.M606906200>
- Papanikolau, Y., M. Papadovasilaki, R.B. Ravelli, A.A. McCarthy, S. Cusack, A. Economou, and K. Petratos. 2007. Structure of dimeric SecA, the *Escherichia coli* preprotein translocase motor. *J. Mol. Biol.* 366:1545–1557. <http://dx.doi.org/10.1016/j.jmb.2006.12.049>
- Papanikou, E., S. Karamanou, and A. Economou. 2007. Bacterial protein secretion through the translocase nanomachine. *Nat. Rev. Microbiol.* 5:839–851. <http://dx.doi.org/10.1038/nrmicro1771>
- Patzelt, H., S. Rüdiger, D. Brehmer, G. Kramer, S. Vorderwülbecke, E. Schaffitzel, A. Waitz, T. Hestekamp, L. Dong, J. Schneider-Mergener, et al. 2001. Binding specificity of *Escherichia coli* trigger factor. *Proc. Natl. Acad. Sci. USA.* 98:14244–14249. <http://dx.doi.org/10.1073/pnas.261432298>
- Saio, T., X. Guan, P. Rossi, A. Economou, and C.G. Kalodimos. 2014. Structural basis for protein antiaggregation activity of the trigger factor chaperone. *Science.* 344:1250494. <http://dx.doi.org/10.1126/science.1250494>
- Sharma, V., A. Arockiasamy, D.R. Ronning, C.G. Savva, A. Holzenburg, M. Braunstein, W.R. Jacobs Jr., and J.C. Sacchettini. 2003. Crystal structure of Mycobacterium tuberculosis SecA, a preprotein translocating ATPase. *Proc. Natl. Acad. Sci. USA.* 100:2243–2248. <http://dx.doi.org/10.1073/pnas.0538077100>
- Studier, F.W., and B.A. Moffatt. 1986. Use of bacteriophage T7 RNA polymerase to direct selective high-level expression of cloned genes. *J. Mol. Biol.* 189:113–130. [http://dx.doi.org/10.1016/0022-2836\(86\)90385-2](http://dx.doi.org/10.1016/0022-2836(86)90385-2)
- Studier, F.W., A.H. Rosenberg, J.J. Dunn, and J.W. Dubendorff. 1990. Use of T7 RNA polymerase to direct expression of cloned genes. *Methods Enzymol.* 185:60–89. [http://dx.doi.org/10.1016/0076-6879\(90\)85008-C](http://dx.doi.org/10.1016/0076-6879(90)85008-C)
- Testa, L., S. Brocca, C. Santambrogio, A. D’Urzo, J. Habchi, S. Longhi, V.N. Uversky, and R. Grandori. 2013. Extracting structural information from charge-state distributions of intrinsically disordered proteins by non-denaturing electrospray-ionization mass spectrometry. *Intrinsically Disord. Proteins.* 1:e25068. <http://dx.doi.org/10.4161/idp.25068>
- Ullers, R.S., D. Ang, F. Schwager, C. Georgopoulos, and P. Genevaux. 2007. Trigger Factor can antagonize both SecB and DnaK/DnaJ chaperone functions in *Escherichia coli*. *Proc. Natl. Acad. Sci. USA.* 104:3101–3106. <http://dx.doi.org/10.1073/pnas.0608232104>
- van der Does, C., T. den Blaauwen, J.G. de Wit, E.H. Manting, N.A. Groot, P. Fekkes, and A.J. Driessen. 1996. SecA is an intrinsic subunit of the *Escherichia coli* preprotein translocase and exposes its carboxyl terminus to the periplasm. *Mol. Microbiol.* 22:619–629. <http://dx.doi.org/10.1046/j.1365-2958.1996.d01-1712.x>
- Vassilyev, D.G., H. Mori, M.N. Vassilyeva, T. Tsukazaki, Y. Kimura, T.H. Tahirov, and K. Ito. 2006. Crystal structure of the translocation ATPase SecA from *Thermus thermophilus* reveals a parallel, head-to-head dimer. *J. Mol. Biol.* 364:248–258. <http://dx.doi.org/10.1016/j.jmb.2006.09.061>
- Zimmer, J., and T.A. Rapoport. 2009. Conformational flexibility and peptide interaction of the translocation ATPase SecA. *J. Mol. Biol.* 394:606–612. <http://dx.doi.org/10.1016/j.jmb.2009.10.024>

Table S7. Primers used in this study

| Primer identity | Forward/reverse | Gene used for/mutation inserted   | Restriction site | Sequence (5'-3')                             |
|-----------------|-----------------|-----------------------------------|------------------|----------------------------------------------|
| X107            | Reverse         | <i>secA</i> 9-834                 | BamHI            | CGCGGATCCTTAAGGCATACGTACCTGAACTTTG           |
| X131            | Reverse         | <i>secA</i>                       | BamHI            | CGGCAGGGATCCTTATTGCAGCGGCCATGGC              |
| X178            | Forward         | <i>secA</i>                       | NdeI             | GGCCCGTACATATGGTTTTTCGGTAGTCGTAAC            |
| X272            | Forward         | <i>secA</i> 9-834                 | KpnI             | CGGGGTACCTTCGGTAGTCGTAACGATCGCACC            |
| X434            | Forward         | <i>secA</i> S809C                 |                  | CAAACGTGAATCGTTCTGCATGTTTTGCAGCGATGC         |
| X435            | Reverse         | <i>secA</i> S809C                 |                  | GCATCGCTGCAACATGCAGAACGATTCACGTTTG           |
| X442            | Forward         | <i>secA</i> P301C                 |                  | GAGTCTCTGTACTCTTGCGCCAACATCATGCTG            |
| X443            | Reverse         | <i>secA</i> P301C                 |                  | CAGCATGATGTTGGCGCAAGAGTACAGAGACC             |
| X534            | Forward         | <i>secA</i> C98A                  |                  | GTTCTTAACGAACGCGCCATCGCCGAAATGCGT            |
| X535            | Reverse         | <i>secA</i> C98A                  |                  | ACGCATTTTCGCGATGGCGCGTTTCGTTAAGAAC           |
| X560            | Forward         | <i>ProPhoA</i>                    | NdeI             | GGGAATTCATATGAAACAAAGCACTATGCA               |
| X561            | Reverse         | <i>ProPhoA</i>                    | XhoI             | GACCCGCTCGAGTTTCAGCCCCAGAGCGGC               |
| X646            | Forward         | <i>phoA</i>                       | NdeI             | GGGAATTCATATGACCCAGAAATGCCTGTT               |
| X649            | Forward         | <i>secA</i> Q830C                 |                  | ACGCTGAGCAAAGTTTGCCTACGTATGCCTGAA            |
| X650            | Reverse         | <i>secA</i> Q830C                 |                  | TTCAGGCATACGTACGCAAACTTTGCTCAGCGT            |
| X678            | Forward         | <i>phoA</i> C194A                 |                  | GTGACCTCGCGCAAAGCCTACGGTCCGAGCGCG            |
| X679            | Reverse         | <i>phoA</i> C194A                 |                  | CGCGCTCGGACCGTAGGCTTTGCGCGAGGTCAC            |
| X680            | Forward         | <i>phoA</i> C204A                 |                  | GCGACCAAGTAAAAAGCTCCGGGTAACGCTCTG            |
| X681            | Reverse         | <i>phoA</i> C204A                 |                  | CAGAGCGTTACCCGGAGCTTTTTCACTGGTCGC            |
| X682            | Forward         | <i>phoA</i> C314A                 |                  | AAGCCCGCAGTACCCTGACCCAAATCCGCAA              |
| X683            | Reverse         | <i>phoA</i> C314A                 |                  | TTGCGGATTTGGCGTAGCGGTGACTGCGGGCTT            |
| X684            | Forward         | <i>phoA</i> C365A                 |                  | CATGCTGCGAATCCTGCTGGGCAAATGGCGAG             |
| X685            | Reverse         | <i>phoA</i> C365A                 |                  | CTCGCAAATTTGCCAGCAGGATTCGCAGCATG             |
| X706            | Forward         | <i>secA</i> M191C                 |                  | TACCTGCGGACAACCTGCGGTTTCAGCCCTGAA            |
| X707            | Reverse         | <i>secA</i> M191C                 |                  | TTCAGGGCTGAACGCGCAGTTGTCGCGCAGGTA            |
| X722            | Forward         | <i>secA</i> R850C                 |                  | CGTATGGAAGCCGAGTGTCTAGCGCAAATGCAG            |
| X723            | Reverse         | <i>secA</i> R850C                 |                  | CTGCATTTGCGCTAAGCACTCGGCTTCCATACG            |
| X728            | Reverse         | <i>phoA</i> ; anneals at K62      | XhoI             | GACCCGCTCGAGATATTTATCGCTAAGAGAATCAGC         |
| X729            | Reverse         | <i>phoA</i> ; anneals at A82      | XhoI             | GACCCGCTCGAGATAGGCAGTAATTTCCGAGTC            |
| X732            | Forward         | <i>proBglX</i>                    | NdeI             | GGGAATTCATATGAAATGGCTATGTTTCAGTAGGAATCGCG    |
| X734            | Forward         | <i>BglX</i>                       | NdeI             | GGGAATTCATATGGATGATTTATTCGGCAACCATCCATTAACG  |
| X741            | Forward         | <i>ProPpiA</i>                    | NdeI             | GGGAATTCATATGTTCAAATCGACCCCTGGCGGGC          |
| X743            | Forward         | <i>PpiA</i>                       | NdeI             | GGGAATTCATATGGCAGCGAAAGGGGACCCG              |
| X744            | Forward         | <i>proAmy1</i>                    | NdeI             | GGGAATTCATATGAAACTCGCCGCTGTTTTCTGACA         |
| X746            | Forward         | <i>Amy1</i>                       | NdeI             | GGGAATTCATATGGCCAGCTGGACTTCTCCGGG            |
| X756            | Forward         | <i>ProOsmB</i>                    | NdeI             | GGGAATTCATATGTTTGTAAAGCAGCAAAAAATGACCCGGG    |
| X757            | Reverse         | <i>ProOsmB</i>                    | XhoI             | GACCCGCTCGAGTTTACCACCTGGTGACCAATAACACCT      |
| X758            | Forward         | <i>OsmB</i>                       | NdeI             | GGGAATTCATATGTGTTCTAACTGGTCTAAACGGGACCG      |
| X771            | Forward         | <i>ProYehR</i>                    | NdeI             | GGGAATTCATATGAAGCTTTCAATAAGCTGTTTTCCCTCG     |
| X772            | Reverse         | <i>ProYehR</i>                    | XhoI             | GACCCGCTCGAGTTTCACTTCTTTAAAACAGCGGCTTTCATCAC |
| X773            | Forward         | <i>YehR</i>                       | NdeI             | GGGAATTCATATGTGCGGTGACAAAGAAGATCGAAGAAATTCAG |
| X806            | Forward         | <i>phoA</i>                       | NdeI, HindIII    | GGGAATTCATATGAAGCTTACACCAGAAATGCCTGTTCTGGAA  |
| X807            | Reverse         | <i>phoA</i> SP                    | HindIII          | CCCAAGCTTCCGGGCTTTGTGCACAGG                  |
| X926            | Reverse         | <i>proPhoA</i> (1-30)             | XhoI             | GACCCGCTCGAGATATTCAGAACAGGCATTTCTGG          |
| X927            | Reverse         | <i>proPhoA</i> (1-40)             | XhoI             | GACCCGCTCGAGATATGCAGTAATATCGCCCTGAGC         |
| X928            | Reverse         | <i>proPhoA</i> (1-50)             | XhoI             | GACCCGCTCGAGATAATCACCCGTTAAACGGCGAGC         |
| X936            | Reverse         | <i>phoA</i> ; anneals at T122     | XhoI             | GACCCGCTCGAGTTAATAGGTGACGTAGTCCGCTTTG        |
| X994            | Reverse         | <i>proPpiA</i> (1-125)            | XhoI             | GACCCGCTCGAGGCTGGTGGCGCTGTCTTTGTCTAG         |
| X993            | Reverse         | <i>proBglX</i> (1-132)            | XhoI             | GACCCGCTCGAGGAGTTAAAGACGAGGCCAGACCG          |
| X995            | Reverse         | <i>proAmy1</i> (1-131)            | XhoI             | GACCCGCTCGAGCACTGTGAGCGGTAATCCATCCATTTTC     |
| X998            | Forward         | <i>proPhoA</i> ( $\Delta$ 21-121) | HindIII          | CCCAAGCTTACCGACTCGGCTGCATCAGCAACCG           |
| X999            | Forward         | <i>phoA</i> ; anneals at T123     | NdeI             | GGGAATTCATATGACCGACTCGGCTGCATCAGCAACCG       |
| X1032           | Forward         | <i>secA</i> K268C                 |                  | TTCTCGGTGGACGAATGCTCTCGCCAGGTGAAC            |
| X1033           | Reverse         | <i>secA</i> K268C                 |                  | GTTACCTGGCGAGAGCATTCGTTCCACCGAGAA            |
| X1040           | Forward         | <i>secA</i> I597C                 |                  | GATGCGCTGATGCGTTGCTTTGCTTCCGACCGA            |
| X1041           | Reverse         | <i>secA</i> I597C                 |                  | TCGGTCGGAAGCAAAGCAACGCATCAGCGCATC            |

|       |         |                                                            |         |                                                |
|-------|---------|------------------------------------------------------------|---------|------------------------------------------------|
| X1048 | Forward | <i>proOsmB C24A</i>                                        |         | ATGTCTCTGAGTGCCGCTTCTAACTGGTCTAAA              |
| X1049 | Reverse | <i>proOsmB C24A</i>                                        |         | TTTAGACCAGTTAGAAAGCGGCACCTCAGAGACAT            |
| X1058 | Forward | <i>phoA I67A-I68T-L69A</i>                                 |         | GATAAACCTGCAAAAAATGCTACTGCGCTGATTGGCGATGGGATG  |
| X1059 | Reverse | <i>phoA I67A-I68T-L69A</i>                                 |         | CATCCCATCGCCAATCAGCGCAGTAGCATTTTTTTGCAGGTTTATC |
| X1060 | Forward | <i>phoA L70T-I71A on phoA I67A-I68T-L69A</i>               |         | GCAAAAAATGCTACTGCGACGGCTGGCGATGGGATGGGGGAC     |
| X1061 | Reverse | <i>phoA L70T-I71A on phoA I67A-I68T-L69A</i>               |         | GTCCCCCATCCCATCGCCAGCCGTCGCAGTAGCATTTTTTTGC    |
| X1062 | Forward | <i>phoA F93A-F94A</i>                                      |         | GCCGAAGGTGCGGGCGCGCTGCTAAAGGTATAGATGCCTTA      |
| X1063 | Reverse | <i>phoA F93A-F94A</i>                                      |         | TAAGGCATCTATACCTTTAGCAGCGCCGCCACCTTCGGC        |
| X1064 | Forward | <i>phoA I97A on phoAF93A-F94A</i>                          |         | GGCGCTGCTAAAGGTGCAGATGCCTTACCGCTT              |
| X1065 | Reverse | <i>phoA I97A on phoAF93A-F94A</i>                          |         | AAGCGGTAAGGCATCTGCACCTTTAGCAGCGCC              |
| X1066 | Forward | <i>phoA L100A-L102A on phoA F93A-F94A-I97A</i>             |         | GCTAAAGGTGCAGATGCCGCACCGGCTACCGGCAATACACTCAC   |
| X1067 | Reverse | <i>phoA L100A-L102A on phoA F93A-F94A-I97A</i>             |         | GTGAGTGTATTGCCCGGTAGCCGGTGGCGCATCTGCACCTTTAGC  |
| X1068 | Forward | <i>proPhoA (Δ23-249)</i>                                   | HindIII | CCCAAGCTTCAGGCACAGGCGCGTG                      |
| X1069 | Forward | <i>proPhoA (Δ23-349)</i>                                   | HindIII | CCCAAGCTTAAACAGGATCATGCTGGAACTCCTT             |
| X1075 | Forward | <i>proLpp C21A</i>                                         |         | ACTCTGTGGCAGGTGCCTCCAGCAACGCTAAA               |
| X1076 | Reverse | <i>proLpp C21A</i>                                         |         | TTTAGCGTTGCTGGAGGCACCTGCCAGCAGAGT              |
| X1077 | Forward | <i>proOsmB C24A</i>                                        | NdeI    | GGGAATCCATATGGCTTCTAACTGGTCTAAACGGGACCGC       |
| X1081 | Forward | <i>ProLpp</i>                                              | NdeI    | GGGAATCCATATGAAAGCTACTAACTGGTACTGGGCG          |
| X1082 | Reverse | <i>ProLpp</i>                                              | XhoI    | GACCCGCTCGAGCATCTTGCGGTATTTAGTAGCCATGTTGTCCAG  |
| X1128 | Forward | <i>ProSpy</i>                                              | NdeI    | GGGAATCCATATGCGTAAATTAAGTGCAGTGTGTTGTGCCTC     |
| X1129 | Reverse | <i>ProSpy</i>                                              | XhoI    | GACCCGCTCGAGCATTTTCAGCAGTTGCAGGCATTTTACCTTTTGC |
| X1130 | Forward | <i>Spy</i>                                                 | NdeI    | GGGAATCCATATGGCAGACACCACTACCGCAGCAC            |
| X1146 | Reverse | <i>phoA 1-122</i>                                          | XhoI    | GACCCGCTCGAGGTTGACGTAGTCCGGTTTGCC              |
| X1171 | Forward | <i>Lpp C21A-I29A</i>                                       | NdeI    | GGGAATCCATATGGCCTCCAGCAACGCTAAAGCCGATCAG       |
| X1184 | Forward | <i>phoA (250-471)</i>                                      | NdeI    | GGGAATCCATATGCAGGCACAGGCGCGTG                  |
| X1185 | Forward | <i>phoA (350-471)</i>                                      | NdeI    | GGGAATCCATATGAAACAGGATCATGCTGCCAATCC           |
| X1188 | Forward | <i>proLpp I27A-L30A</i>                                    |         | TCCAGCAACGCTAAAGCCGATCAGGCGTCTTCT              |
| X1189 | Reverse | <i>proLpp I27A-L30A</i>                                    |         | AGAAGACGCCCTGATCGGCTTTAGCGTTGCTGGA             |
| X1190 | Forward | <i>proLpp I27A-L30A-V34A</i>                               |         | GCTAAAGCCGATCAGGCGTCTTCTGACGCTCAG              |
| X1191 | Reverse | <i>proLpp I27A-L30A-V34A</i>                               |         | CTGAGCGTCCAGAACGCGCTGATCGGCTTTAGC              |
| X1192 | Forward | <i>proLpp L30A-V34A-L37A</i>                               |         | CAGGCGTCTTCTGACGCTCAGACTGCGAACGCT              |
| X1193 | Reverse | <i>proLpp L30A-V34A-L37A</i>                               |         | AGCGTTCGCAGTCTGAGCGTCCAGAACGCGCTG              |
| X1194 | Forward | <i>proLpp V34A-L37A-V41A</i>                               |         | TCTGACGCTCAGACTGCGAACGCTAAAGCTGAC              |
| X1195 | Reverse | <i>proLpp V34A-L37A-V41A</i>                               |         | GTCAGCTTTAGCGTTTCGCAGTCTGAGCGTCCAG             |
| X1196 | Forward | <i>proLpp L37A-V41A-L44A</i>                               |         | ACTGCGAACGCTAAAGCTGACCAGGCGAGCAAC              |
| X1197 | Reverse | <i>proLpp L37A-V41A-L44A</i>                               |         | GTTGCTCGCCTGGTTCAGCTTTAGCGTTTCGCAGT            |
| X1198 | Forward | <i>proLpp V41A-L44A-V48A</i>                               |         | GCTAAAGCTGACCAGGCGAGCAACGACGCGAAC              |
| X1199 | Reverse | <i>proLpp V41A-L44A-V48A</i>                               |         | GTTGCGTCTGCTGCGCTGGTTCAGCTTTAGC                |
| X1200 | Forward | <i>proLpp L44A-V48A</i>                                    |         | CAGGCGAGCAACGACGCGAACGCAATGCGTTCC              |
| X1201 | Reverse | <i>proLpp L44A-V48A</i>                                    |         | GGAACGCATTGCGTTTCGCGTCTGCTCGCCTG               |
| X1202 | Forward | <i>proLpp V55A</i>                                         |         | GCAATGCGTTCCGACGCTCAGGCTGCTAAAGAT              |
| X1203 | Reverse | <i>proLpp V55A</i>                                         |         | ATCTTTAGCAGCTGAGCGTCCGAAACGCATTGC              |
| X1204 | Forward | <i>proLpp L69A</i>                                         |         | CGTGCTAACGCGTGGGACAAACATGGCTACT                |
| X1205 | Reverse | <i>proLpp L69A</i>                                         |         | AGTAGCCATGTTGTCCGACGCTGGTTAGCAGC               |
| X1393 | Forward | <i>ProHdeN</i>                                             | NdeI    | GGGAATCCATATGAAAAAGTATTAGCGTTATTCTTG           |
| X1394 | Reverse | <i>ProHdeN</i>                                             | XhoI    | GACCCGCTCGAGCATATCTTTCTTAATTTGTCCC             |
| X1395 | Forward | <i>HdeN</i>                                                | NdeI    | GGGAATCCATATGGCGGATGCGCAAAAAGCAGCTGAT          |
| X1422 | Forward | <i>ProYncJ</i>                                             | NdeI    | GGGAATCCATATGTTTACGAAGGCGTTATCGGTTG            |
| X1423 | Reverse | <i>ProYncJ</i>                                             | XhoI    | GACCCGCTCGAGACGTTGTCGCGCTTCTGGTTTG             |
| X1424 | Forward | <i>YncJ</i>                                                | NdeI    | GGGAATCCATATGGGGCACAAGGACATGAATTT              |
| X1570 | Reverse | <i>YncJ</i> ; inserts 2 Methionine at the end of the genes | XhoI    | GACCCGCTCGAGCATCATATCTTTCTTAATTTGTCCC          |
| X1571 | Reverse | <i>HdeN</i> ; inserts 2 Methionine at the end of the genes | XhoI    | GACCCGCTCGAGCATCATATCTTTCTTAATTTGTCCC          |

|       |         |                                                                  |         |                                               |
|-------|---------|------------------------------------------------------------------|---------|-----------------------------------------------|
| X1572 | Reverse | <i>phoA</i> ; inserts 1<br>Methionine at the end of<br>the genes | XhoI    | GACCCGCTCGAGcatGGTCCC GG TGGTGGTTTTTC         |
| X1915 | Forward | Destroys HindIII site for<br>constructing pMBB1570               |         | CACCACCACCACTGAAA ACTTGGCTGTTTTGGC            |
| X1916 | Reverse | Destroys HindIII site for<br>constructing pMBB1570               |         | GCCAAAACAGCCAAGTTTTTCAGTGGTGGTGGTG            |
| X1926 | Forward | <i>Gentamicin gene</i>                                           | MscI    | GACCCGTGGCCAGCCTCGACTTCCCTGCTGCC              |
| X1927 | Reverse | <i>Gentamicin gene</i>                                           | Scal    | AAATTTAGTACTCCAAGGGCATGGTAAAG                 |
| X1954 | Forward | <i>secA I224A-I225A</i>                                          |         | GAAGCGCGTACACCGCTGGCGGCGTCCGGCCCCGAGAAAGAC    |
| X1955 | Reverse | <i>secA I224A-I225A</i>                                          |         | GTCTTCTGCGGGCCGACGCGCCAGCGGTGTACGCGCTTC       |
| X1958 | Forward | <i>secA M191A-F193A</i>                                          |         | GACTACCTGCGCGACAACGCGCGGCGAGCCCTGAAGAACGTGTA  |
| X1959 | Reverse | <i>secA M191A-F193A</i>                                          |         | TACACGTTCTTCAGGGCTCGCCGCGCGTGTGTCGCGCAGGTAGTC |
| X1973 | Reverse | <i>ProYncJ</i>                                                   | HindIII | CCCAAGCTTACGTTGTCCC GCTTCTGGTTTTG             |

The following primers either from the microchemistry facility at the Institute of Molecular Biology and Biotechnology, Macrogen, or Metabion were used for plasmid constructs (as indicated).



Table S8. **Predicted hydrodynamic diameters of preproteins handled by the Sec translocase**

| Entry name (Uniprot) | Length (amino acids) | Folded $D_H$ (nm) | Unfolded $D_H$ (nm) | Entry name (Uniprot) | Length (amino acids) | Folded $D_H$ (nm) | PDB code | Polypeptide chain analyzed |
|----------------------|----------------------|-------------------|---------------------|----------------------|----------------------|-------------------|----------|----------------------------|
| YEEJ_ECOLI           | 2358                 | 9.14              | 37.41               | ACRA_ECOLI           | 268                  | 8.04              | 2F1M     | A                          |
| YDBA_ECOLI           | 2003                 | 8.71              | 34.07               | AGP_ECOLI            | 391                  | 5.58              | 1NT4     | A                          |
| YFHM_ECOLI           | 1653                 | 8.24              | 30.52               | ALSB_ECOLI           | 288                  | 7.56              | 1GUD     | A                          |
| YFAS_ECOLI           | 1534                 | 8.06              | 29.24               | AMIC_ECOLI           | 383                  | 5.7               | 4BIN     | A                          |
| YPJA_ECOLI           | 1526                 | 8.05              | 29.15               | AMID_ECOLI           | 259                  | 5.38              | 2WKX     | A                          |
| ACFD_ECOLI           | 1520                 | 8.04              | 29.09               | AMO_ECOLI            | 721                  | 7.22              | 1QAF     | A                          |
| YDEK_ECOLI           | 1325                 | 7.72              | 26.89               | AMPC_ECOLI           | 358                  | 5.08              | 2R9W     | A                          |
| YHDP_ECOLI           | 1266                 | 7.62              | 26.20               | APBE_ECOLI           | 331                  | 5.22              | 2O18     | A                          |
| YFAL_ECOLI           | 1250                 | 7.59              | 26.01               | APHA_ECOLI           | 211                  | 4.7               | 2B82     | A                          |
| BCSC_ECOLI           | 1157                 | 7.42              | 24.88               | ARAF_ECOLI           | 306                  | 5.52              | 2WRZ     | A                          |
| AG43_ECOLI           | 1039                 | 7.19              | 23.39               | ASPG2_ECOLI          | 326                  | 5.26              | 1JJA     | A                          |
| NFRA_ECOLI           | 990                  | 7.09              | 22.75               | BAMA_ECOLI           | 390                  | 9.28              | 3EFC     | A                          |
| YAIT_ECOLI           | 968                  | 7.04              | 22.46               | BAMB_ECOLI           | 371                  | 5.28              | 2YH3     | A                          |
| PTRA_ECOLI           | 962                  | 7.03              | 22.38               | BAMC_ECOLI           | 119                  | 3.48              | 2YH5     | A                          |
| PQQL_ECOLI           | 931                  | 6.96              | 21.97               | BAMD_ECOLI           | 223                  | 6.14              | 3Q5M     | A                          |
| CHIA_ECOLI           | 897                  | 6.89              | 21.50               | BAME_ECOLI           | 93                   | 5.48              | 2KXX     | A                          |
| YFCU_ECOLI           | 881                  | 6.85              | 21.28               | BLC_ECOLI            | 155                  | 3.88              | 2ACO     | A                          |
| FIMD_ECOLI           | 878                  | 6.84              | 21.24               | BTUB_ECOLI           | 590                  | 6.54              | 2GSK     | A                          |
| SFMD_ECOLI           | 867                  | 6.82              | 21.09               | BTUF_ECOLI           | 244                  | 5.26              | 1N4D     | A                          |
| YCBS_ECOLI           | 866                  | 6.82              | 21.08               | CIRA_ECOLI           | 638                  | 6.32              | 2HDF     | A                          |
| HTRE_ECOLI           | 865                  | 6.81              | 21.06               | CPXP_ECOLI           | 130                  | 5                 | 3ITF     | A                          |
| YEJO_ECOLI           | 863                  | 6.81              | 21.03               | CUEO_ECOLI           | 488                  | 5.38              | 3PAU     | A                          |
| YAGX_ECOLI           | 841                  | 6.76              | 20.72               | CUSB_ECOLI           | 330                  | 9.4               | 3T51     | B                          |
| YRAJ_ECOLI           | 838                  | 6.75              | 20.68               | CUSC_ECOLI           | 440                  | 6.98              | 4K34     | A                          |
| YEHB_ECOLI           | 826                  | 6.72              | 20.51               | CUSF_ECOLI           | 88                   | 2.98              | 2VB2     | A                          |
| YQIG_ECOLI           | 821                  | 6.71              | 20.44               | DACA_ECOLI           | 363                  | 6.08              | 1Z6F     | A                          |
| YBGQ_ECOLI           | 815                  | 6.70              | 20.36               | DACB_ECOLI           | 457                  | 6.48              | 2EX8     | A                          |
| DMSA_ECOLI           | 814                  | 6.69              | 20.34               | DACC_ECOLI           | 351                  | 5.96              | 3ITA     | A                          |
| YAET_ECOLI           | 810                  | 6.68              | 20.28               | DEGP_ECOLI           | 448                  | 6.28              | 3MH6     | A                          |
| TORZ_ECOLI           | 809                  | 6.68              | 20.27               | DEGQ_ECOLI           | 427                  | 4.14              | 3STI     | A                          |
| PGAA_ECOLI           | 807                  | 6.68              | 20.24               | DEGS_ECOLI           | 329                  | 6.04              | 3GCN     | A                          |
| YNFF_ECOLI           | 807                  | 6.68              | 20.24               | DGAL_ECOLI           | 309                  | 5.3               | 2HPH     | A                          |
| YHCD_ECOLI           | 793                  | 6.64              | 20.04               | DPPA_ECOLI           | 507                  | 4.4               | 1DPE     | A                          |
| YDDB_ECOLI           | 790                  | 6.64              | 20.00               | DDBA_ECOLI           | 189                  | 4.4               | 1A2J     | A                          |
| LPTD_ECOLI           | 784                  | 6.62              | 19.91               | DSBC_ECOLI           | 217                  | 4.9               | 1JZD     | A                          |
| YGJK_ECOLI           | 783                  | 6.62              | 19.89               | DSBG_ECOLI           | 231                  | 5.96              | 2H0G     | A                          |
| FECA_ECOLI           | 774                  | 6.60              | 19.76               | ECOT_ECOLI           | 142                  | 5.42              | 1ECY     | A                          |
| YDBD_ECOLI           | 768                  | 6.58              | 19.67               | EFEB_ECOLI           | 388                  | 5.52              | 2Y4E     | A                          |
| BGLX_ECOLI           | 765                  | 6.57              | 19.63               | EMTA_ECOLI           | 187                  | 4.12              | 4HJV     | A                          |
| FIU_ECOLI            | 760                  | 6.56              | 19.56               | ENVC_ECOLI           | 142                  | 6.26              | 4BH5     | A                          |
| AMO_ECOLI            | 757                  | 6.55              | 19.51               | FADL_ECOLI           | 421                  | 6.44              | 3PGR     | A                          |
| FHUA_ECOLI           | 747                  | 6.53              | 19.36               | FDNG_ECOLI           | 1015                 | 7.16              | 1KQF     | A                          |
| FEPA_ECOLI           | 746                  | 6.53              | 19.35               | FECA_ECOLI           | 741                  | 6.44              | 1PO0     | A                          |
| FHUE_ECOLI           | 729                  | 6.48              | 19.10               | FEPA_ECOLI           | 724                  | 6.48              | 1FEP     | A                          |
| YNCD_ECOLI           | 700                  | 6.40              | 18.66               | FEPB_ECOLI           | 318                  | 5.18              | 3TLK     | A                          |
| GFGD_ECOLI           | 698                  | 6.40              | 18.63               | FHUA_ECOLI           | 714                  | 6.62              | 1QFF     | A                          |
| YJBH_ECOLI           | 698                  | 6.40              | 18.63               | FHUD_ECOLI           | 266                  | 4.94              | 1ESZ     | A                          |
| PRC_ECOLI            | 682                  | 6.36              | 18.38               | FIMC_ECOLI           | 205                  | 6.82              | 3BWU     | C                          |
| YRAM_ECOLI           | 678                  | 6.35              | 18.32               | FIMD_ECOLI           | 125                  | 4.22              | 3BWU     | D                          |
| AMY1_ECOLI           | 676                  | 6.34              | 18.29               | FKBA_ECOLI           | 224                  | 6.82              | 1Q6U     | A                          |
| PGAB_ECOLI           | 672                  | 6.33              | 18.23               | FTSP_ECOLI           | 443                  | 5.32              | 2UXT     | A                          |
| CIRA_ECOLI           | 663                  | 6.30              | 18.09               | GFCB_ECOLI           | 198                  | 4.48              | 2IN5     | A                          |
| YJCS_ECOLI           | 661                  | 6.30              | 18.05               | GGT_ECOLI            | 366                  | 6.24              | 2E0X     | A                          |
| GSPD_ECOLI           | 650                  | 6.27              | 17.88               | GLNH_ECOLI           | 226                  | 5.02              | 1GGG     | A                          |
| CPDB_ECOLI           | 647                  | 6.26              | 17.83               | GLPQ_ECOLI           | 334                  | 5.02              | 1T8Q     | A                          |
| SLT_ECOLI            | 645                  | 6.25              | 17.80               | GSIB_ECOLI           | 489                  | 6.2               | 1UQW     | A                          |
| YACH_ECOLI           | 617                  | 6.17              | 17.36               | GSPH_ECOLI           | 140                  | 4.52              | 2KNQ     | A                          |
| BTUB_ECOLI           | 614                  | 6.16              | 17.31               | GUN_ECOLI            | 347                  | 4.96              | 3QXF     | A                          |

|             |     |      |       |
|-------------|-----|------|-------|
| YEJA_ECOLI  | 604 | 6.13 | 17.15 |
| TRAN_ECOLI  | 602 | 6.13 | 17.11 |
| GGT_ECOLI   | 580 | 6.06 | 16.75 |
| YTFM_ECOLI  | 577 | 6.05 | 16.70 |
| YFBK_ECOLI  | 575 | 6.05 | 16.67 |
| TREA_ECOLI  | 565 | 6.02 | 16.50 |
| YFAA_ECOLI  | 562 | 6.01 | 16.45 |
| YDEN_ECOLI  | 560 | 6.00 | 16.42 |
| ASLA_ECOLI  | 551 | 5.97 | 16.27 |
| OPGD_ECOLI  | 551 | 5.97 | 16.27 |
| USHA_ECOLI  | 550 | 5.97 | 16.25 |
| YFAQ_ECOLI  | 549 | 5.97 | 16.23 |
| YAGW_ECOLI  | 547 | 5.96 | 16.20 |
| SAPA_ECOLI  | 547 | 5.96 | 16.20 |
| OPPA_ECOLI  | 543 | 5.95 | 16.13 |
| BGLH_ECOLI  | 538 | 5.93 | 16.05 |
| MPPA_ECOLI  | 537 | 5.93 | 16.03 |
| DPPA_ECOLI  | 535 | 5.92 | 16.00 |
| YGIS_ECOLI  | 535 | 5.92 | 16.00 |
| NIKA_ECOLI  | 524 | 5.88 | 15.81 |
| MLTF_ECOLI  | 518 | 5.86 | 15.70 |
| CUEO_ECOLI  | 516 | 5.86 | 15.67 |
| DDPA_ECOLI  | 516 | 5.86 | 15.67 |
| GSIB_ECOLI  | 512 | 5.84 | 15.60 |
| OPGG_ECOLI  | 511 | 5.84 | 15.58 |
| YDGA_ECOLI  | 502 | 5.81 | 15.42 |
| YHJJ_ECOLI  | 498 | 5.80 | 15.35 |
| TOLC_ECOLI  | 493 | 5.78 | 15.26 |
| MDTP_ECOLI  | 488 | 5.76 | 15.18 |
| YFGC_ECOLI  | 487 | 5.76 | 15.16 |
| MDTQ_ECOLI  | 478 | 5.73 | 15.00 |
| NRFA_ECOLI  | 478 | 5.73 | 15.00 |
| DACB_ECOLI  | 477 | 5.73 | 14.98 |
| DEGP_ECOLI  | 474 | 5.71 | 14.92 |
| PPB_ECOLI   | 471 | 5.70 | 14.87 |
| SUFI_ECOLI  | 470 | 5.70 | 14.85 |
| YBFM_ECOLI  | 468 | 5.69 | 14.82 |
| YHJA_ECOLI  | 465 | 5.68 | 14.76 |
| YCHO_ECOLI  | 464 | 5.68 | 14.74 |
| YAHJ_ECOLI  | 460 | 5.66 | 14.67 |
| PAT_ECOLI   | 459 | 5.66 | 14.65 |
| TRAH1_ECOLI | 458 | 5.66 | 14.63 |
| CUSC_ECOLI  | 457 | 5.65 | 14.62 |
| DEGQ_ECOLI  | 455 | 5.65 | 14.58 |
| MLTD_ECOLI  | 452 | 5.64 | 14.52 |
| FADL_ECOLI  | 446 | 5.61 | 14.41 |
| LAMB_ECOLI  | 446 | 5.61 | 14.41 |
| AMIB_ECOLI  | 445 | 5.61 | 14.39 |
| YDDW_ECOLI  | 439 | 5.59 | 14.28 |
| UGPB_ECOLI  | 438 | 5.58 | 14.26 |
| YNJE_ECOLI  | 435 | 5.57 | 14.21 |
| YFEW_ECOLI  | 434 | 5.57 | 14.19 |
| PPA_ECOLI   | 432 | 5.56 | 14.15 |
| YCJN_ECOLI  | 430 | 5.55 | 14.12 |
| TOLB_ECOLI  | 430 | 5.55 | 14.12 |
| SURA_ECOLI  | 428 | 5.55 | 14.08 |
| YBHC_ECOLI  | 427 | 5.54 | 14.06 |
| YCDB_ECOLI  | 423 | 5.53 | 13.98 |
| UIDC_ECOLI  | 421 | 5.52 | 13.95 |
| WECC_ECOLI  | 420 | 5.52 | 13.93 |
| YIBP_ECOLI  | 419 | 5.51 | 13.91 |
| AMIC_ECOLI  | 417 | 5.50 | 13.87 |
| MDTA_ECOLI  | 415 | 5.50 | 13.83 |
| AGP_ECOLI   | 413 | 5.49 | 13.79 |

|             |     |      |      |   |
|-------------|-----|------|------|---|
| HDEA_ECOLI  | 89  | 3.24 | 1DJ8 | A |
| HDEB_ECOLI  | 79  | 3.16 | 2XUV | A |
| HISJ_ECOLI  | 233 | 4.62 | 1HSL | A |
| HIUH_ECOLI  | 114 | 3.76 | 2G2P | A |
| HSJL_ECOLI  | 116 | 3.96 | 2KTS | A |
| IVY_ECOLI   | 128 | 3.68 | 1GPQ | A |
| LAMB_ECOLI  | 421 | 5.86 | 1MPM | A |
| LIVJ_ECOLI  | 344 | 5.14 | 1Z17 | A |
| LIVK_ECOLI  | 346 | 5.34 | 1USI | A |
| LOLA_ECOLI  | 182 | 4.16 | 2ZPC | A |
| LOLB_ECOLI  | 186 | 4.08 | 1IWM | A |
| LPP_ECOLI   | 56  | 6.2  | 1EQ7 | A |
| LPTA_ECOLI  | 159 | 3.94 | 2R19 | A |
| MALE_ECOLI  | 358 | 6.36 | 3IOW | A |
| MATB_ECOLI  | 155 | 4.8  | 3QS3 | A |
| MEPA_ECOLI  | 255 | 4.56 | 1U10 | A |
| MLIC_ECOLI  | 82  | 3.64 | 2F09 | A |
| MLTA_ECOLI  | 344 | 5.72 | 2GAE | A |
| MLTB_ECOLI  | 320 | 5.64 | 1LTM | A |
| MLTD_ECOLI  | 48  | 3.02 | 1E0G | A |
| MODA_ECOLI  | 233 | 4.68 | 1WOD | A |
| MPPA_ECOLI  | 515 | 6.06 | 3O9P | A |
| NANC_ECOLI  | 215 | 4.76 | 2WJQ | A |
| NANM_ECOLI  | 349 | 5.04 | 2UVK | A |
| NAPA_ECOLI  | 792 | 6.48 | 2NYA | A |
| NIKA_ECOLI  | 502 | 6.38 | 2NOO | A |
| NLPE_ECOLI  | 216 | 8.02 | 2Z4H | A |
| NLPI_ECOLI  | 275 | 4.92 | 1XNF | A |
| NRFA_ECOLI  | 441 | 5.86 | 2RF7 | A |
| NRFB_ECOLI  | 163 | 4.18 | 2OZY | A |
| OMPA_ECOLI  | 171 | 4.26 | 1QJP | A |
| OMPC_ECOLI  | 346 | 5.5  | 2J1N | A |
| OMPF_ECOLI  | 362 | 5.66 | 3HWB | A |
| OMPG_ECOLI  | 280 | 5.3  | 2IWW | A |
| OMPT_ECOLI  | 297 | 5.98 | 1I78 | A |
| OMPW_ECOLI  | 191 | 4.94 | 2F1V | A |
| OMPX_ECOLI  | 148 | 4.76 | 1QJ8 | A |
| OPGG_ECOLI  | 489 | 6.38 | 1TXK | A |
| OPPA_ECOLI  | 516 | 6.34 | 3TCH | A |
| PAT_ECOLI   | 269 | 5    | 1ILZ | A |
| PAGP_ECOLI  | 161 | 6.96 | 1MM5 | A |
| PAL_ECOLI   | 109 | 3.56 | 2HQS | C |
| PANE_ECOLI  | 303 | 4.96 | 1YJQ | A |
| PGAB_ECOLI  | 614 | 6.86 | 4F9D | A |
| PHNP_ECOLI  | 252 | 4.64 | 3G1P | A |
| PHOE_ECOLI  | 330 | 5.62 | 1PHO | A |
| PLIG_ECOLI  | 111 | 3.74 | 4DY3 | A |
| POTD_ECOLI  | 325 | 5.12 | 1POT | A |
| POTF_ECOLI  | 344 | 5.28 | 4JDF | A |
| PPA_ECOLI   | 410 | 5.6  | 1DKN | A |
| PPB_ECOLI   | 449 | 5.68 | 1KH5 | A |
| PPIA_ECOLI  | 166 | 3.76 | 1J2A | A |
| PROX_ECOLI  | 309 | 5.48 | 1R9L | A |
| PSPE_ECOLI  | 85  | 3.5  | 2JTR | A |
| PSTS_ECOLI  | 321 | 5.18 | 1A40 | A |
| PTFB1_ECOLI | 108 | 3.74 | 2KYR | A |
| PTRA_ECOLI  | 939 | 8.76 | 1Q2L | A |
| RBSB_ECOLI  | 271 | 5.14 | 1DRK | A |
| RCSF_ECOLI  | 118 | 7.38 | 2L8Y | A |
| RMLA1_ECOLI | 293 | 4.84 | 1H5S | A |
| RNI_ECOLI   | 245 | 4.4  | 2PGX | A |
| RSEB_ECOLI  | 296 | 5.4  | 2V42 | A |
| SKP_ECOLI   | 142 | 6.48 | 1SG2 | A |
| SLT_ECOLI   | 618 | 7.36 | 1QTE | A |

|             |     |      |       |
|-------------|-----|------|-------|
| INTA_ECOLI  | 413 | 5.49 | 13.79 |
| HOFQ_ECOLI  | 412 | 5.49 | 13.77 |
| YADC_ECOLI  | 412 | 5.49 | 13.77 |
| YADE_ECOLI  | 409 | 5.47 | 13.72 |
| CUSB_ECOLI  | 407 | 5.47 | 13.68 |
| DACA_ECOLI  | 403 | 5.45 | 13.60 |
| DACC_ECOLI  | 400 | 5.44 | 13.54 |
| YEDS_ECOLI  | 397 | 5.43 | 13.48 |
| ACRA_ECOLI  | 397 | 5.43 | 13.48 |
| MALE_ECOLI  | 396 | 5.42 | 13.47 |
| YFGL_ECOLI  | 392 | 5.41 | 13.39 |
| YCIM_ECOLI  | 389 | 5.39 | 13.33 |
| YIEL_ECOLI  | 389 | 5.39 | 13.33 |
| YNJB_ECOLI  | 388 | 5.39 | 13.31 |
| DACD_ECOLI  | 388 | 5.39 | 13.31 |
| EMRK_ECOLI  | 387 | 5.39 | 13.29 |
| AMPH_ECOLI  | 385 | 5.38 | 13.25 |
| ACRE_ECOLI  | 385 | 5.38 | 13.25 |
| MDTE_ECOLI  | 385 | 5.38 | 13.25 |
| YDCS_ECOLI  | 381 | 5.36 | 13.17 |
| NLPD_ECOLI  | 379 | 5.35 | 13.13 |
| WZA_ECOLI   | 379 | 5.35 | 13.13 |
| GFCE_ECOLI  | 379 | 5.35 | 13.13 |
| OMP_N_ECOLI | 377 | 5.34 | 13.09 |
| AMPN_ECOLI  | 377 | 5.34 | 13.09 |
| YCDO_ECOLI  | 375 | 5.34 | 13.05 |
| MBHT_ECOLI  | 372 | 5.32 | 12.99 |
| YLII_ECOLI  | 371 | 5.32 | 12.97 |
| POTF_ECOLI  | 370 | 5.32 | 12.95 |
| LIVK_ECOLI  | 369 | 5.31 | 12.93 |
| GUN_ECOLI   | 368 | 5.31 | 12.91 |
| NANM_ECOLI  | 368 | 5.31 | 12.91 |
| OMPC_ECOLI  | 367 | 5.30 | 12.89 |
| LIVJ_ECOLI  | 367 | 5.30 | 12.89 |
| MLTA_ECOLI  | 365 | 5.29 | 12.85 |
| NMPC_ECOLI  | 365 | 5.29 | 12.85 |
| YAIW_ECOLI  | 364 | 5.29 | 12.83 |
| YRAK_ECOLI  | 363 | 5.29 | 12.81 |
| RLPA_ECOLI  | 362 | 5.28 | 12.79 |
| OMPF_ECOLI  | 362 | 5.28 | 12.79 |
| MLTB_ECOLI  | 361 | 5.28 | 12.77 |
| MLTC_ECOLI  | 359 | 5.27 | 12.73 |
| GLPQ_ECOLI  | 358 | 5.26 | 12.71 |
| YGJJ_ECOLI  | 356 | 5.26 | 12.67 |
| YCBT_ECOLI  | 356 | 5.26 | 12.67 |
| DEGS_ECOLI  | 355 | 5.25 | 12.65 |
| YQII_ECOLI  | 354 | 5.25 | 12.63 |
| YBGO_ECOLI  | 353 | 5.24 | 12.61 |
| YNCE_ECOLI  | 353 | 5.24 | 12.61 |
| PHOE_ECOLI  | 351 | 5.23 | 12.57 |
| APBE_ECOLI  | 351 | 5.23 | 12.57 |
| YIIG_ECOLI  | 351 | 5.23 | 12.57 |
| POTD_ECOLI  | 348 | 5.22 | 12.51 |
| ASPG2_ECOLI | 348 | 5.22 | 12.51 |
| YPPG_ECOLI  | 347 | 5.22 | 12.48 |
| OMPA_ECOLI  | 346 | 5.21 | 12.46 |
| PSTS_ECOLI  | 346 | 5.21 | 12.46 |
| IAP_ECOLI   | 345 | 5.21 | 12.44 |
| NLPB_ECOLI  | 344 | 5.20 | 12.42 |
| YEHA_ECOLI  | 344 | 5.20 | 12.42 |
| TORT_ECOLI  | 342 | 5.19 | 12.38 |
| YHDW_ECOLI  | 341 | 5.19 | 12.36 |
| LSRB_ECOLI  | 340 | 5.19 | 12.34 |
| PHND_ECOLI  | 338 | 5.18 | 12.30 |

|            |     |       |      |   |
|------------|-----|-------|------|---|
| SODC_ECOLI | 154 | 3.84  | 1ESO | A |
| SODF_ECOLI | 192 | 4.14  | 1ISC | A |
| SODM_ECOLI | 205 | 4.32  | 1IX9 | A |
| SPR_ECOLI  | 126 | 4.32  | 2K1G | A |
| SSUA_ECOLI | 295 | 6.16  | 2X26 | A |
| SURA_ECOLI | 103 | 3.46  | 2PV1 | A |
| TAMA_ECOLI | 254 | 7.46  | 4BZA | A |
| TESA_ECOLI | 182 | 4.02  | 1JRL | A |
| THIB_ECOLI | 309 | 4.94  | 2QRY | A |
| TOLB_ECOLI | 408 | 5.68  | 2HQS | A |
| TOLC_ECOLI | 450 | 10.42 | 2VDD | A |
| TREA_ECOLI | 535 | 5.92  | 2JG0 | A |
| TrxB_ECOLI | 316 | 5.74  | 1TDE | A |
| TSX_ECOLI  | 272 | 5.22  | 1TLY | A |
| UGPB_ECOLI | 415 | 5.42  | 4AQ4 | A |
| USHA_ECOLI | 525 | 6.46  | 1O18 | A |
| VISC_ECOLI | 365 | 5.66  | 4K22 | A |
| XYLF_ECOLI | 307 | 5.44  | 3M9X | A |
| YAJI_ECOLI | 159 | 8.32  | 2JWY | A |
| YBCL_ECOLI | 162 | 3.92  | 1FUX | A |
| YBGF_ECOLI | 75  | 7.48  | 2XDJ | A |
| YBHC_ECOLI | 399 | 5.32  | 3GRH | A |
| YCEB_ECOLI | 167 | 4.82  | 3L6I | A |
| YCEI_ECOLI | 191 | 4.36  | 1Y0G | A |
| YEDY_ECOLI | 290 | 4.46  | 1XDQ | A |
| YEHR_ECOLI | 130 | 5     | 2JOE | A |
| YFEY_ECOLI | 164 | 4.18  | 2QZB | A |
| YGDR_ECOLI | 51  | 3.26  | 2JN0 | A |
| YGIW_ECOLI | 109 | 3.28  | 1NNX | A |
| YGJK_ECOLI | 760 | 7.26  | 3W7T | A |
| YIAD_ECOLI | 141 | 4.86  | 2K1S | A |
| YLII_ECOLI | 350 | 5.08  | 2G8S | A |
| YMGD_ECOLI | 90  | 3.34  | 2LRM | A |
| YNCE_ECOLI | 353 | 4.7   | 3VGZ | A |
| YNJE_ECOLI | 412 | 5.72  | 2WLX | A |
| YODA_ECOLI | 193 | 4.38  | 1OEK | A |
| YTFQ_ECOLI | 297 | 5.16  | 2VK2 | A |
| ZNUA_ECOLI | 284 | 4.82  | 2PRS | A |

|            |     |      |       |
|------------|-----|------|-------|
| CYSP_ECOLI | 338 | 5.18 | 12.30 |
| YGGM_ECOLI | 335 | 5.16 | 12.24 |
| YNHG_ECOLI | 334 | 5.16 | 12.21 |
| YEDY_ECOLI | 334 | 5.16 | 12.21 |
| DGAL_ECOLI | 332 | 5.15 | 12.17 |
| PROX_ECOLI | 330 | 5.14 | 12.13 |
| XYLF_ECOLI | 330 | 5.14 | 12.13 |
| TRAU_ECOLI | 330 | 5.14 | 12.13 |
| SUBL_ECOLI | 329 | 5.14 | 12.11 |
| ARAF_ECOLI | 329 | 5.14 | 12.11 |
| YIAO_ECOLI | 328 | 5.13 | 12.09 |
| HYBA_ECOLI | 328 | 5.13 | 12.09 |
| THIB_ECOLI | 327 | 5.13 | 12.07 |
| GSPK_ECOLI | 327 | 5.13 | 12.07 |
| SFMH_ECOLI | 327 | 5.13 | 12.07 |
| YPHF_ECOLI | 327 | 5.13 | 12.07 |
| YDJG_ECOLI | 326 | 5.12 | 12.05 |
| TRXB_ECOLI | 321 | 5.10 | 11.94 |
| YCFS_ECOLI | 320 | 5.09 | 11.92 |
| TAUA_ECOLI | 320 | 5.09 | 11.92 |
| YIBQ_ECOLI | 319 | 5.09 | 11.90 |
| SSUA_ECOLI | 319 | 5.09 | 11.90 |
| FEPB_ECOLI | 318 | 5.09 | 11.88 |
| RSEB_ECOLI | 318 | 5.09 | 11.88 |
| YTFQ_ECOLI | 318 | 5.09 | 11.88 |
| OMPT_ECOLI | 317 | 5.08 | 11.85 |
| YDGH_ECOLI | 314 | 5.07 | 11.79 |
| ALSB_ECOLI | 311 | 5.05 | 11.73 |
| PBP7_ECOLI | 310 | 5.05 | 11.70 |
| ZNUA_ECOLI | 310 | 5.05 | 11.70 |
| ERFK_ECOLI | 310 | 5.05 | 11.70 |
| YQHG_ECOLI | 308 | 5.04 | 11.66 |
| MALM_ECOLI | 306 | 5.03 | 11.62 |
| YBIS_ECOLI | 306 | 5.03 | 11.62 |
| OSMF_ECOLI | 305 | 5.02 | 11.60 |
| YDEQ_ECOLI | 304 | 5.02 | 11.57 |
| PANE_ECOLI | 303 | 5.01 | 11.55 |
| GLTI_ECOLI | 302 | 5.01 | 11.53 |
| OMPG_ECOLI | 301 | 5.00 | 11.51 |
| FECB_ECOLI | 300 | 5.00 | 11.49 |
| FIMH_ECOLI | 300 | 5.00 | 11.49 |
| RBSB_ECOLI | 296 | 4.98 | 11.40 |
| YBCH_ECOLI | 296 | 4.98 | 11.40 |
| FHUD_ECOLI | 296 | 4.98 | 11.40 |
| NLPI_ECOLI | 294 | 4.97 | 11.35 |
| TSX_ECOLI  | 294 | 4.97 | 11.35 |
| PA1_ECOLI  | 289 | 4.95 | 11.24 |
| AMIA_ECOLI | 289 | 4.95 | 11.24 |
| YGHF_ECOLI | 288 | 4.94 | 11.22 |
| YGEG_ECOLI | 278 | 4.89 | 11.00 |
| CSGG_ECOLI | 277 | 4.88 | 10.97 |
| AMID_ECOLI | 276 | 4.88 | 10.95 |
| YAEF_ECOLI | 274 | 4.87 | 10.91 |
| YEEZ_ECOLI | 274 | 4.87 | 10.91 |
| MEPA_ECOLI | 274 | 4.87 | 10.91 |
| BAX_ECOLI  | 274 | 4.87 | 10.91 |
| YDGD_ECOLI | 273 | 4.86 | 10.88 |
| YFCO_ECOLI | 273 | 4.86 | 10.88 |
| NLPA_ECOLI | 272 | 4.86 | 10.86 |
| YDHO_ECOLI | 271 | 4.85 | 10.84 |
| METQ_ECOLI | 271 | 4.85 | 10.84 |
| FKBA_ECOLI | 270 | 4.85 | 10.81 |
| RNI_ECOLI  | 268 | 4.84 | 10.77 |
| FLIY_ECOLI | 266 | 4.83 | 10.72 |

|             |     |      |       |
|-------------|-----|------|-------|
| BTUF_ECOLI  | 266 | 4.83 | 10.72 |
| YBGF_ECOLI  | 263 | 4.81 | 10.65 |
| YAFT_ECOLI  | 261 | 4.80 | 10.61 |
| HISJ_ECOLI  | 260 | 4.79 | 10.58 |
| ARGT_ECOLI  | 260 | 4.79 | 10.58 |
| YFAP_ECOLI  | 258 | 4.78 | 10.54 |
| MODA_ECOLI  | 257 | 4.78 | 10.51 |
| YAI0_ECOLI  | 257 | 4.78 | 10.51 |
| YCAL_ECOLI  | 254 | 4.76 | 10.44 |
| YFEN_ECOLI  | 254 | 4.76 | 10.44 |
| YIGE_ECOLI  | 254 | 4.76 | 10.44 |
| GLTF_ECOLI  | 254 | 4.76 | 10.44 |
| YGGG_ECOLI  | 252 | 4.75 | 10.40 |
| PHNP_ECOLI  | 252 | 4.75 | 10.40 |
| YDIY_ECOLI  | 252 | 4.75 | 10.40 |
| MLAA_ECOLI  | 251 | 4.75 | 10.37 |
| YGER_ECOLI  | 251 | 4.75 | 10.37 |
| YFCS_ECOLI  | 250 | 4.74 | 10.35 |
| YQIH_ECOLI  | 249 | 4.73 | 10.33 |
| YAFL_ECOLI  | 249 | 4.73 | 10.33 |
| MIPA_ECOLI  | 248 | 4.73 | 10.30 |
| GLNH_ECOLI  | 248 | 4.73 | 10.30 |
| GFCC_ECOLI  | 248 | 4.73 | 10.30 |
| DSBG_ECOLI  | 248 | 4.73 | 10.30 |
| TRAF_ECOLI  | 247 | 4.72 | 10.28 |
| YGGE_ECOLI  | 246 | 4.72 | 10.25 |
| ECPD_ECOLI  | 246 | 4.72 | 10.25 |
| YAFK_ECOLI  | 246 | 4.72 | 10.25 |
| YIAT_ECOLI  | 246 | 4.72 | 10.25 |
| YFIO_ECOLI  | 245 | 4.71 | 10.23 |
| YJBG_ECOLI  | 245 | 4.71 | 10.23 |
| TRAT1_ECOLI | 244 | 4.71 | 10.21 |
| ARTI_ECOLI  | 243 | 4.70 | 10.18 |
| ARTJ_ECOLI  | 243 | 4.70 | 10.18 |
| YBGP_ECOLI  | 242 | 4.70 | 10.16 |
| TRAK1_ECOLI | 242 | 4.70 | 10.16 |
| FIMC_ECOLI  | 241 | 4.69 | 10.13 |
| YGGN_ECOLI  | 239 | 4.68 | 10.09 |
| YEHC_ECOLI  | 239 | 4.68 | 10.09 |
| YHCF_ECOLI  | 238 | 4.67 | 10.06 |
| NANC_ECOLI  | 238 | 4.67 | 10.06 |
| YFHG_ECOLI  | 237 | 4.67 | 10.04 |
| APHA_ECOLI  | 237 | 4.67 | 10.04 |
| NLPE_ECOLI  | 236 | 4.66 | 10.01 |
| DSBC_ECOLI  | 236 | 4.66 | 10.01 |
| YCBF_ECOLI  | 236 | 4.66 | 10.01 |
| YAGV_ECOLI  | 236 | 4.66 | 10.01 |
| YIAF_ECOLI  | 236 | 4.66 | 10.01 |
| YNFC_ECOLI  | 236 | 4.66 | 10.01 |
| END1_ECOLI  | 235 | 4.65 | 9.99  |
| YCBR_ECOLI  | 233 | 4.64 | 9.94  |
| FLGH_ECOLI  | 232 | 4.64 | 9.92  |
| YHJY_ECOLI  | 232 | 4.64 | 9.92  |
| YJAH_ECOLI  | 231 | 4.63 | 9.89  |
| YRAI_ECOLI  | 231 | 4.63 | 9.89  |
| FLGD_ECOLI  | 231 | 4.63 | 9.89  |
| OMPL_ECOLI  | 230 | 4.63 | 9.87  |
| SFMC_ECOLI  | 230 | 4.63 | 9.87  |
| YJCO_ECOLI  | 229 | 4.62 | 9.84  |
| YDJY_ECOLI  | 225 | 4.60 | 9.74  |
| YHCA_ECOLI  | 224 | 4.59 | 9.72  |
| YDCL_ECOLI  | 222 | 4.58 | 9.67  |
| MATC_ECOLI  | 222 | 4.58 | 9.67  |
| YDHX_ECOLI  | 222 | 4.58 | 9.67  |

|             |     |      |      |
|-------------|-----|------|------|
| YCCT_ECOLI  | 220 | 4.57 | 9.62 |
| YIAD_ECOLI  | 219 | 4.56 | 9.59 |
| FLGA_ECOLI  | 219 | 4.56 | 9.59 |
| YIDX_ECOLI  | 218 | 4.55 | 9.57 |
| YODA_ECOLI  | 216 | 4.54 | 9.52 |
| GFCB_ECOLI  | 214 | 4.53 | 9.47 |
| YCFM_ECOLI  | 213 | 4.52 | 9.44 |
| YJBF_ECOLI  | 212 | 4.52 | 9.42 |
| OMPW_ECOLI  | 212 | 4.52 | 9.42 |
| TRBC_ECOLI  | 212 | 4.52 | 9.42 |
| MLAC_ECOLI  | 211 | 4.51 | 9.39 |
| YFDX_ECOLI  | 211 | 4.51 | 9.39 |
| TRAW_ECOLI  | 210 | 4.50 | 9.37 |
| TESA_ECOLI  | 208 | 4.49 | 9.32 |
| DSBA_ECOLI  | 208 | 4.49 | 9.32 |
| LOLB_ECOLI  | 207 | 4.49 | 9.29 |
| YFAT_ECOLI  | 207 | 4.49 | 9.29 |
| RNFG_ECOLI  | 206 | 4.48 | 9.26 |
| YIJF_ECOLI  | 205 | 4.47 | 9.24 |
| EMTA_ECOLI  | 203 | 4.46 | 9.19 |
| LOLA_ECOLI  | 203 | 4.46 | 9.19 |
| YIIX_ECOLI  | 202 | 4.45 | 9.16 |
| OSMY_ECOLI  | 201 | 4.45 | 9.13 |
| YADL_ECOLI  | 201 | 4.45 | 9.13 |
| AIS_ECOLI   | 200 | 4.44 | 9.11 |
| YIIQ_ECOLI  | 199 | 4.43 | 9.08 |
| NRFG_ECOLI  | 198 | 4.43 | 9.06 |
| YADK_ECOLI  | 198 | 4.43 | 9.06 |
| GSPJ_ECOLI  | 195 | 4.41 | 8.98 |
| MATB_ECOLI  | 195 | 4.41 | 8.98 |
| YADN_ECOLI  | 194 | 4.40 | 8.95 |
| YRAH_ECOLI  | 194 | 4.40 | 8.95 |
| LPTE_ECOLI  | 193 | 4.39 | 8.92 |
| YEAY_ECOLI  | 193 | 4.39 | 8.92 |
| YAJG_ECOLI  | 192 | 4.39 | 8.90 |
| YRAP_ECOLI  | 191 | 4.38 | 8.87 |
| YFEY_ECOLI  | 191 | 4.38 | 8.87 |
| YCEI_ECOLI  | 191 | 4.38 | 8.87 |
| YBAY_ECOLI  | 190 | 4.37 | 8.85 |
| PPIA_ECOLI  | 190 | 4.37 | 8.85 |
| YBFC_ECOLI  | 189 | 4.37 | 8.82 |
| YADM_ECOLI  | 189 | 4.37 | 8.82 |
| SPR_ECOLI   | 188 | 4.36 | 8.79 |
| SLP_ECOLI   | 188 | 4.36 | 8.79 |
| NRFB_ECOLI  | 188 | 4.36 | 8.79 |
| YBGD_ECOLI  | 188 | 4.36 | 8.79 |
| YFCV_ECOLI  | 187 | 4.35 | 8.76 |
| YMBA_ECOLI  | 187 | 4.35 | 8.76 |
| YCEB_ECOLI  | 186 | 4.35 | 8.74 |
| CRCA_ECOLI  | 186 | 4.35 | 8.74 |
| LPTA_ECOLI  | 185 | 4.34 | 8.71 |
| DCRB_ECOLI  | 185 | 4.34 | 8.71 |
| YBET_ECOLI  | 184 | 4.33 | 8.68 |
| YTFJ_ECOLI  | 184 | 4.33 | 8.68 |
| YGIL_ECOLI  | 183 | 4.33 | 8.66 |
| MLAD_ECOLI  | 183 | 4.33 | 8.66 |
| YBCL_ECOLI  | 183 | 4.33 | 8.66 |
| FIMA1_ECOLI | 182 | 4.32 | 8.63 |
| YHCE_ECOLI  | 181 | 4.31 | 8.60 |
| TRBB_ECOLI  | 181 | 4.31 | 8.60 |
| YFAZ_ECOLI  | 180 | 4.31 | 8.58 |
| SFMA_ECOLI  | 180 | 4.31 | 8.58 |
| YEHD_ECOLI  | 180 | 4.31 | 8.58 |
| YAJI_ECOLI  | 179 | 4.30 | 8.55 |

|            |     |      |      |
|------------|-----|------|------|
| FIMI_ECOLI | 179 | 4.30 | 8.55 |
| YCBQ_ECOLI | 179 | 4.30 | 8.55 |
| YFCP_ECOLI | 179 | 4.30 | 8.55 |
| YFGL_ECOLI | 179 | 4.30 | 8.55 |
| BLC_ECOLI  | 177 | 4.29 | 8.49 |
| LYSQ_ECOLI | 177 | 4.29 | 8.49 |
| FIMF_ECOLI | 176 | 4.28 | 8.47 |
| YDES_ECOLI | 176 | 4.28 | 8.47 |
| PAL_ECOLI  | 173 | 4.26 | 8.38 |
| SODC_ECOLI | 173 | 4.26 | 8.38 |
| YFGH_ECOLI | 172 | 4.25 | 8.36 |
| YFIR_ECOLI | 172 | 4.25 | 8.36 |
| YBJP_ECOLI | 171 | 4.24 | 8.33 |
| TRAV_ECOLI | 171 | 4.24 | 8.33 |
| OMPX_ECOLI | 171 | 4.24 | 8.33 |
| SFMF_ECOLI | 171 | 4.24 | 8.33 |
| YCBV_ECOLI | 171 | 4.24 | 8.33 |
| SECM_ECOLI | 170 | 4.23 | 8.30 |
| YFCR_ECOLI | 170 | 4.23 | 8.30 |
| GSPH_ECOLI | 169 | 4.23 | 8.27 |
| X19F_ECOLI | 169 | 4.23 | 8.27 |
| YOEA_ECOLI | 167 | 4.21 | 8.22 |
| YDER_ECOLI | 167 | 4.21 | 8.22 |
| FIMG_ECOLI | 167 | 4.21 | 8.22 |
| CPXP_ECOLI | 166 | 4.21 | 8.19 |
| RZPQ_ECOLI | 165 | 4.20 | 8.16 |
| LYSD_ECOLI | 165 | 4.20 | 8.16 |
| YBFP_ECOLI | 164 | 4.19 | 8.13 |
| YJJA_ECOLI | 164 | 4.19 | 8.13 |
| ECOT_ECOLI | 162 | 4.18 | 8.07 |
| YECT_ECOLI | 162 | 4.18 | 8.07 |
| YFCQ_ECOLI | 162 | 4.18 | 8.07 |
| SKP_ECOLI  | 161 | 4.17 | 8.05 |
| SPY_ECOLI  | 161 | 4.17 | 8.05 |
| YFIB_ECOLI | 160 | 4.16 | 8.02 |
| PBL_ECOLI  | 158 | 4.15 | 7.96 |
| IVY_ECOLI  | 157 | 4.14 | 7.93 |
| CREA_ECOLI | 157 | 4.14 | 7.93 |
| PPDA_ECOLI | 156 | 4.13 | 7.90 |
| SLYB_ECOLI | 155 | 4.12 | 7.87 |
| YFJT_ECOLI | 155 | 4.12 | 7.87 |
| YKFB_ECOLI | 155 | 4.12 | 7.87 |
| NLPC_ECOLI | 154 | 4.11 | 7.84 |
| YEHR_ECOLI | 153 | 4.11 | 7.81 |
| YIBG_ECOLI | 153 | 4.11 | 7.81 |
| YEGJ_ECOLI | 153 | 4.11 | 7.81 |
| CSGB_ECOLI | 151 | 4.09 | 7.76 |
| CSGA_ECOLI | 151 | 4.09 | 7.76 |
| NAPB_ECOLI | 149 | 4.07 | 7.70 |
| YFJS_ECOLI | 147 | 4.06 | 7.64 |
| YAFY_ECOLI | 147 | 4.06 | 7.64 |
| YHHA_ECOLI | 146 | 4.05 | 7.61 |
| ZRAP_ECOLI | 141 | 4.01 | 7.46 |
| HSIJ_ECOLI | 140 | 4.00 | 7.43 |
| CSGF_ECOLI | 138 | 3.98 | 7.37 |
| YEDD_ECOLI | 137 | 3.98 | 7.34 |
| HIUH_ECOLI | 137 | 3.98 | 7.34 |
| YUAE_ECOLI | 137 | 3.98 | 7.34 |
| YGHG_ECOLI | 136 | 3.97 | 7.31 |
| YGDB_ECOLI | 135 | 3.96 | 7.27 |
| RCSF_ECOLI | 134 | 3.95 | 7.24 |
| YAAI_ECOLI | 134 | 3.95 | 7.24 |
| YCGK_ECOLI | 133 | 3.94 | 7.21 |
| YUBK_ECOLI | 132 | 3.93 | 7.18 |

|             |     |      |      |
|-------------|-----|------|------|
| YGIW_ECOLI  | 130 | 3.92 | 7.12 |
| YDEI_ECOLI  | 130 | 3.92 | 7.12 |
| FLHE_ECOLI  | 130 | 3.92 | 7.12 |
| CSGE_ECOLI  | 129 | 3.91 | 7.09 |
| RUTC_ECOLI  | 128 | 3.90 | 7.06 |
| YBGS_ECOLI  | 126 | 3.88 | 6.99 |
| YCFI_ECOLI  | 125 | 3.87 | 6.96 |
| YFFQ_ECOLI  | 125 | 3.87 | 6.96 |
| YFEK_ECOLI  | 124 | 3.86 | 6.93 |
| YOBA_ECOLI  | 124 | 3.86 | 6.93 |
| YBAV_ECOLI  | 123 | 3.85 | 6.90 |
| YBBC_ECOLI  | 122 | 3.84 | 6.87 |
| YQJC_ECOLI  | 122 | 3.84 | 6.87 |
| YCGJ_ECOLI  | 122 | 3.84 | 6.87 |
| YFIL_ECOLI  | 121 | 3.83 | 6.83 |
| YEBF_ECOLI  | 118 | 3.81 | 6.74 |
| YJEI_ECOLI  | 117 | 3.80 | 6.70 |
| YACC_ECOLI  | 115 | 3.78 | 6.64 |
| SMPA_ECOLI  | 113 | 3.76 | 6.57 |
| YEBY_ECOLI  | 113 | 3.76 | 6.57 |
| YNFB_ECOLI  | 113 | 3.76 | 6.57 |
| OSME_ECOLI  | 112 | 3.75 | 6.54 |
| YOHN_ECOLI  | 112 | 3.75 | 6.54 |
| HDEA_ECOLI  | 110 | 3.73 | 6.47 |
| CSGC_ECOLI  | 110 | 3.73 | 6.47 |
| CUSF_ECOLI  | 110 | 3.73 | 6.47 |
| YIDQ_ECOLI  | 110 | 3.73 | 6.47 |
| MLIC_ECOLI  | 109 | 3.72 | 6.44 |
| BSMA_ECOLI  | 109 | 3.72 | 6.44 |
| YJDP_ECOLI  | 109 | 3.72 | 6.44 |
| YKGJ_ECOLI  | 109 | 3.72 | 6.44 |
| YMGD_ECOLI  | 109 | 3.72 | 6.44 |
| YBFN_ECOLI  | 108 | 3.71 | 6.40 |
| HDEB_ECOLI  | 108 | 3.71 | 6.40 |
| YPEC_ECOLI  | 108 | 3.71 | 6.40 |
| PTFB1_ECOLI | 108 | 3.71 | 6.40 |
| YDBL_ECOLI  | 108 | 3.71 | 6.40 |
| YECR_ECOLI  | 107 | 3.70 | 6.37 |
| YFIM_ECOLI  | 107 | 3.70 | 6.37 |
| PSIF_ECOLI  | 106 | 3.69 | 6.33 |
| YEGR_ECOLI  | 105 | 3.68 | 6.30 |
| PSPE_ECOLI  | 104 | 3.67 | 6.27 |
| YMDA_ECOLI  | 103 | 3.66 | 6.23 |
| ASR_ECOLI   | 102 | 3.65 | 6.20 |
| YNFD_ECOLI  | 101 | 3.64 | 6.16 |
| YSAB_ECOLI  | 99  | 3.62 | 6.09 |
| YAAX_ECOLI  | 98  | 3.61 | 6.06 |
| YDAS_ECOLI  | 98  | 3.61 | 6.06 |
| BORD_ECOLI  | 97  | 3.60 | 6.02 |
| YICS_ECOLI  | 97  | 3.60 | 6.02 |
| YDDL_ECOLI  | 96  | 3.58 | 5.99 |
| YUAS_ECOLI  | 95  | 3.57 | 5.95 |
| YBJH_ECOLI  | 94  | 3.56 | 5.91 |
| YEHE_ECOLI  | 93  | 3.55 | 5.88 |
| YPDI_ECOLI  | 91  | 3.53 | 5.81 |
| YJFN_ECOLI  | 91  | 3.53 | 5.81 |
| YJFY_ECOLI  | 91  | 3.53 | 5.81 |
| YAHO_ECOLI  | 91  | 3.53 | 5.81 |
| YNJH_ECOLI  | 90  | 3.52 | 5.77 |
| YDBJ_ECOLI  | 88  | 3.49 | 5.70 |
| YHCN_ECOLI  | 87  | 3.48 | 5.66 |
| YBIJ_ECOLI  | 86  | 3.47 | 5.62 |
| MCBA_ECOLI  | 86  | 3.47 | 5.62 |
| YQHH_ECOLI  | 85  | 3.46 | 5.58 |



|            |    |      |      |
|------------|----|------|------|
| BHSA_ECOLI | 85 | 3.46 | 5.58 |
| YOAF_ECOLI | 84 | 3.45 | 5.55 |
| RZOQ_ECOLI | 84 | 3.45 | 5.55 |
| YJBE_ECOLI | 80 | 3.40 | 5.39 |
| LPP_ECOLI  | 78 | 3.37 | 5.32 |
| YKGI_ECOLI | 78 | 3.37 | 5.32 |
| YNCJ_ECOLI | 76 | 3.35 | 5.24 |
| YGDI_ECOLI | 75 | 3.34 | 5.20 |
| YCEK_ECOLI | 75 | 3.34 | 5.20 |
| YHDV_ECOLI | 73 | 3.31 | 5.12 |
| OSMB_ECOLI | 72 | 3.30 | 5.08 |
| YGDR_ECOLI | 72 | 3.30 | 5.08 |
| MARB_ECOLI | 72 | 3.30 | 5.08 |
| YIFL_ECOLI | 67 | 3.23 | 4.87 |
| RZOR_ECOLI | 61 | 3.14 | 4.62 |
| YNBE_ECOLI | 61 | 3.14 | 4.62 |
| RZOD_ECOLI | 60 | 3.12 | 4.58 |
| YDCA_ECOLI | 57 | 3.08 | 4.44 |
| YHFL_ECOLI | 55 | 3.05 | 4.35 |
| HOKD_ECOLI | 51 | 2.98 | 4.17 |
| HOKC_ECOLI | 50 | 2.96 | 4.12 |
| ECNB_ECOLI | 48 | 2.93 | 4.03 |
| MGRB_ECOLI | 47 | 2.91 | 3.98 |
| ECNA_ECOLI | 41 | 2.80 | 3.68 |

Table S9. Identity and index of proPhoA peptides used on the peptide arrays

| No | Start aa | Peptide sequence | No | Start aa | Peptide sequence | No  | Start aa | Peptide sequence | No  | Start aa | Peptide sequence | No  | Start aa | Peptide sequence |
|----|----------|------------------|----|----------|------------------|-----|----------|------------------|-----|----------|------------------|-----|----------|------------------|
| 1  | 1        | MKQSTIALALLPL    | 36 | 106      | YTHYALNKKTGKP    | 71  | 211      | GSITEQLLNARAD    | 106 | 316      | DSVPTLAQMTDKA    | 141 | 421      | VMSYGNSEEDSQE    |
| 2  | 4        | STIALALLPLLFT    | 37 | 109      | YALNKKTGKPDYV    | 72  | 214      | TEQLLNARADVTL    | 107 | 319      | PTLAQMTDKAIEL    | 142 | 424      | YGNSEEDSQEHTG    |
| 3  | 7        | ALALLPLLFTPV     | 38 | 112      | NKKTGKPDYVTD     | 73  | 217      | LLNARADVTLGGG    | 108 | 322      | AQMTDKAIELLSK    | 143 | 427      | SEEDSQEHTGSQ     |
| 4  | 10       | LLPLLFTPVTKAR    | 39 | 115      | TGKPDYVTDASA     | 74  | 220      | ARADVTLGGGAKT    | 109 | 325      | TDKAIELLSKNEK    | 144 | 430      | DSQEHTGSQRLIA    |
| 5  | 13       | LLFTPVTKARTPE    | 40 | 118      | PDYVTDASAASATA   | 75  | 223      | DVTLGGGAKTFAE    | 110 | 328      | AIELLSKNEKGFF    | 145 | 433      | EHTGSQRLIAAYG    |
| 6  | 16       | TPVTKARTPEMPV    | 41 | 121      | VTDSAASATAWST    | 76  | 226      | LGGGAKTFAETAT    | 111 | 331      | LLSKNEKGFFLQV    | 146 | 436      | GSQRLIAAYGPHA    |
| 7  | 19       | TKARTPEMPVLEN    | 42 | 124      | SAASATAWSTGVK    | 77  | 229      | GAKTFAETATAGE    | 112 | 334      | KNEKGFFLQVEGA    | 147 | 439      | LRIAAYGPHAANV    |
| 8  | 22       | RTPEMPVLENRAA    | 43 | 127      | SATAWSTGVKTYN    | 78  | 232      | TFAETATAGEWQG    | 113 | 337      | KGFFLQVEGASID    | 148 | 442      | AAYGPHAANVVGL    |
| 9  | 25       | EMPVLENRAAQGD    | 44 | 130      | AWSTGVKTYNGAL    | 79  | 235      | ETATAGEWQGTKL    | 114 | 340      | FLQVEGASIDKQD    | 149 | 445      | GPHAANVVGLTDQ    |
| 10 | 28       | VLENRAAQGDITA    | 45 | 133      | TGVKTYNGALGVD    | 80  | 238      | TAGEWQGTKLREQ    | 115 | 343      | VEGASIDKQDHAA    | 150 | 448      | AANVVGLTDQTDL    |
| 11 | 31       | NRAAQGDITAPGG    | 46 | 136      | KTYNGALGVDIHE    | 81  | 241      | EWQGTKLREQAQA    | 116 | 346      | ASIDKQDHAAANPC   | 151 | 451      | VVGLTDQTDLFYT    |
| 12 | 34       | AQGDITAPGGARR    | 47 | 139      | NGALGVDIHEKDH    | 82  | 244      | GKTLREQAQARGY    | 117 | 349      | DKQDHAAANPCGQI   | 152 | 454      | LTDQTDLFYTMKA    |
| 13 | 37       | DITAPGGARRLTG    | 48 | 142      | LGVDIHEKDHP      | 83  | 247      | LREQAQARGYQLV    | 118 | 352      | DHAANPCGQIGET    | 153 | 457      | QTDLFYTMKAALG    |
| 14 | 40       | APGGARRLTGDQT    | 49 | 145      | DIHEKDHP         | 84  | 250      | QAQARGYQLVSDA    | 119 | 355      | ANPCGQIGETVDL    | 154 | 460      | DLFYTMKAALGLK    |
| 15 | 43       | GARRLTGDQTAAL    | 50 | 148      | EKDHP            | 85  | 253      | ARGYQLVSDAASL    | 120 | 358      | CGQIGETVDLDEA    |     |          |                  |
| 16 | 46       | RLTGDQTAALRDS    | 51 | 151      | HPTILEMAKAAAGL   | 86  | 256      | YQLVSDAASLNSV    | 121 | 361      | IGETVDLDEAVQR    |     |          |                  |
| 17 | 49       | GDQTAALRDSLS     | 52 | 154      | ILEMAKAAAGLATG   | 87  | 259      | VSDAASLNSVTEA    | 122 | 364      | TVDLDEAVQRALE    |     |          |                  |
| 18 | 52       | TAALRDSLSDKPA    | 53 | 157      | MAKAAAGLATGNVS   | 88  | 262      | AASLNSVTEANQQ    | 123 | 367      | LDEAVQRALEFAK    |     |          |                  |
| 19 | 55       | LRDSLSDKPAKNI    | 54 | 160      | AAGLATGNVSTAE    | 89  | 265      | LNSVTEANQQKPL    | 124 | 370      | AVQRALEFAKKEG    |     |          |                  |
| 20 | 58       | SLSDKPAKNIILL    | 55 | 163      | LATGNVSTAEIQD    | 90  | 268      | VTEANQQKPLLGL    | 125 | 373      | RALEFAKKEGNL     |     |          |                  |
| 21 | 61       | DKPAKNIILLIGD    | 56 | 166      | GNVSTAEIQDATP    | 91  | 271      | ANQQKPLLGLFAD    | 126 | 376      | EFAKKEGNLIV      |     |          |                  |
| 22 | 64       | AKNIILLIGDGMG    | 57 | 169      | STAEIQDATPAAL    | 92  | 274      | QKPLLGLFADGNM    | 127 | 379      | KKEGNLIVVTAD     |     |          |                  |
| 23 | 67       | IILLIGDGMGDSE    | 58 | 172      | ELQDATPAALVAH    | 93  | 277      | LLGLFADGNMPVR    | 128 | 382      | GNTLIVVTADHAH    |     |          |                  |
| 24 | 70       | LIGDGMGDSEITA    | 59 | 175      | DATPAALVAHVTS    | 94  | 280      | LFADGNMPVRWLG    | 129 | 385      | LVIVTADHAHASQ    |     |          |                  |
| 25 | 73       | DGMGDSEITAARN    | 60 | 178      | PAALVAHVTSRKC    | 95  | 283      | DGNMPVRWLGPKA    | 130 | 388      | VTADHAHASQIVA    |     |          |                  |
| 26 | 76       | GDSEITAARNYAE    | 61 | 181      | LVAHVTSRKCYP     | 96  | 286      | MPVRWLGPKATYH    | 131 | 391      | DHAHASQIVAPDT    |     |          |                  |
| 27 | 79       | EITAARNYAEAG     | 62 | 184      | HVTSRKCYP        | 97  | 289      | RWLGPKATYHGNI    | 132 | 394      | HASQIVAPDTKAP    |     |          |                  |
| 28 | 82       | AARNYAEAGGFF     | 63 | 187      | SRKCYP           | 98  | 292      | GPKATYHGNI       | 133 | 397      | QIVAPDTKAPGLT    |     |          |                  |
| 29 | 85       | NYAEGAGFFKGI     | 64 | 190      | CYGPSATSEKCPG    | 99  | 295      | ATYHGNI          | 134 | 400      | APDTKAPGLTQAL    |     |          |                  |
| 30 | 88       | EGAGFFKGI        | 65 | 193      | PSATSEKCPGNAL    | 100 | 298      | HGNI             | 135 | 403      | TKAPGLTQALNTK    |     |          |                  |
| 31 | 91       | GGFFKGI          | 66 | 196      | TSEKCPNALEK      | 101 | 301      | IDKPAVTCTPNPQ    | 136 | 406      | PGLTQALNTKDGA    |     |          |                  |
| 32 | 94       | FKGI             | 67 | 199      | KCPNALEKGGK      | 102 | 304      | PAVTCTPNPQRND    | 137 | 409      | TQALNTKDGA       |     |          |                  |
| 33 | 97       | IDLPLTGQYTHY     | 68 | 202      | GNALEKGGKGSIT    | 103 | 307      | TCTPNPQRNDSVP    | 138 | 412      | LNTKDGA          |     |          |                  |
| 34 | 100      | LPLTGQYTHYALN    | 69 | 205      | LEKGGKGSIT       | 104 | 310      | PNPQRNDSVPTLA    | 139 | 415      | KDGA             |     |          |                  |
| 35 | 103      | TGQYTHYALNKKT    | 70 | 208      | GGKGSIT          | 105 | 313      | QRNDSVPTLAQMT    | 140 | 418      | AVMMSYGNSEED     |     |          |                  |
